# Supplementary material
Source: Research Square preprint supplement (doi:10.21203/rs.3.rs-9719695/v1)

$$\text{Allen--Cahn equation: } \varepsilon^2 \Delta u + u - u^3 = 0$$

(a)  $L_2$  error vs.  $\varepsilon$

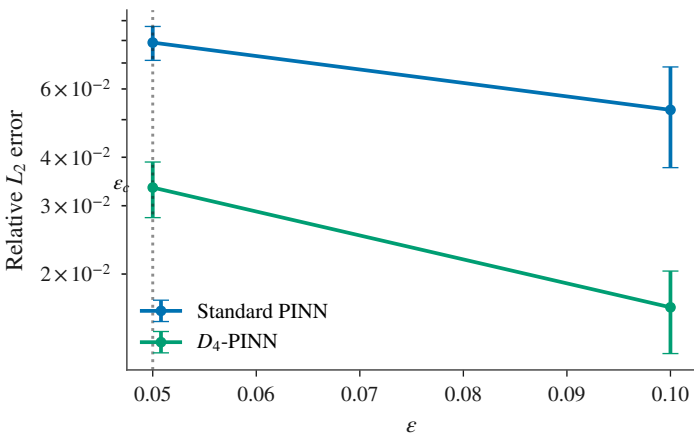

(b) Symmetry deviation vs.  $\varepsilon$

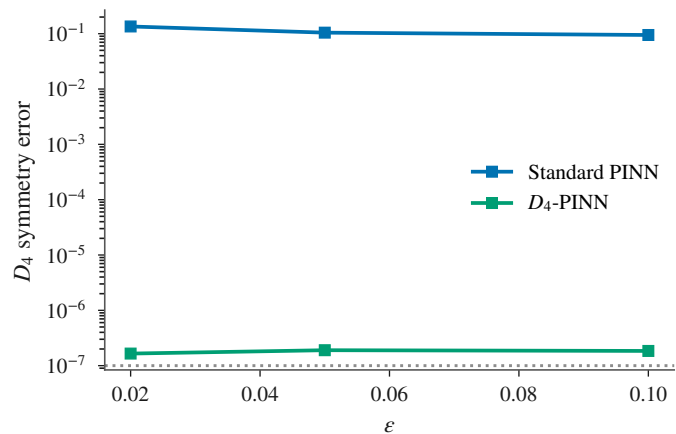

(c)  $\varepsilon = 0.02$ : symmetry-breaking regime

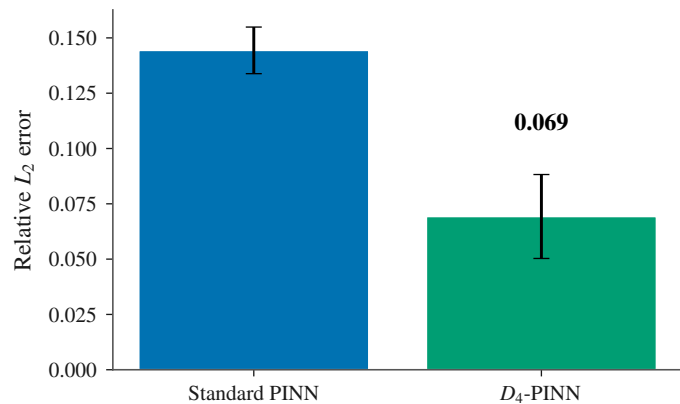

(d) Computational cost

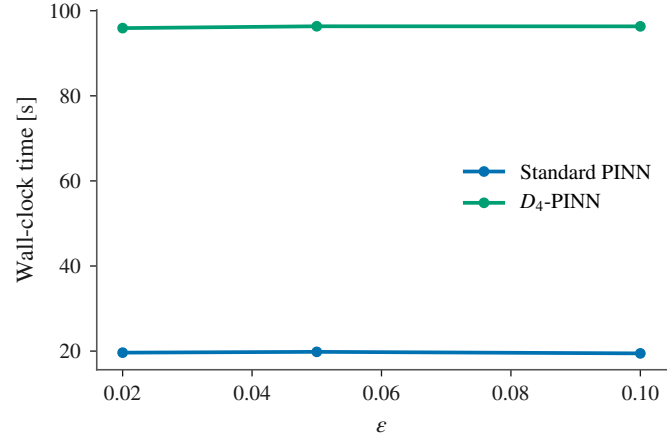

Supplement: Supplementary file 9 [file fig_allen_cahn.pdf › d4-pinn/output_20260508_215013/figures/fig_allen_cahn.pdf]
