# Supplementary material
Source: Research Square preprint supplement (doi:10.21203/rs.3.rs-9719695/v1)
Supplement: Supplementary file 35 [file fig0_architecture.pdf › d4-pinn/output_demo/figures/fig0_architecture.pdf]

# $D_4$ -PINN — Reynolds-Averaged Group-Equivariant Architecture

Input Space

$\Omega = (-1, 1)^2$   
square domain

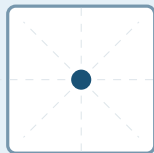

$\mathbf{x} = (x, y)$

$D_4$  Orbit Expansion

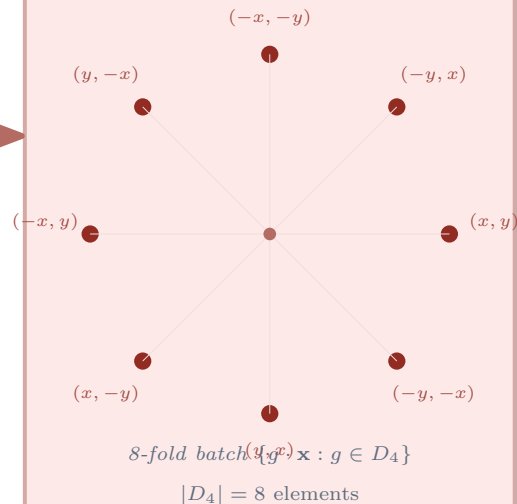

Reynolds Average  $\mathcal{R}_{D_4}$

$$\frac{1}{|D_4|} \sum_{g \in D_4} f_\theta(g \cdot \mathbf{x})$$

Shared MLP  $f_\theta$

Activation:  $\sigma = \tanh$

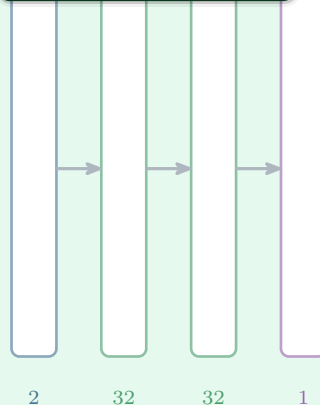

Batched  $\times 8$  (einsum)  
1185 parameters

Output

$u_\theta(\mathbf{x})$   
 $D_4$ -invariant  
solution

✓ Sum  $\approx 10^{-8}$

**Proposition 1 (Architectural Invariance):**  $\forall \theta \in \Theta, \forall \mathbf{x} \in \mathbb{R}^2, u_\theta(g' \cdot \mathbf{x}) = u_\theta(\mathbf{x})$  for all  $g' \in D_4$  (the Reynolds average makes every forward pass exactly  $D_4$ -invariant at machine precision)

Input Space

$D_4$  Orbit Expansion

Shared MLP  $f_\theta$

Reynolds Average

Output
