# Supplementary material
Source: Research Square preprint supplement (doi:10.21203/rs.3.rs-9719695/v1)
Supplement: Supplementary file 62 [file fig_nn_schematic.pdf › d4-pinn/output_demo/figures/fig_nn_schematic.pdf]

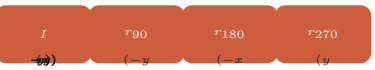

# $D_4$ -PINN Computational Graph

$D_4$  Orbit Expansion – 8 Transformed Inputs Shared MLP  $f_\theta$  (Applied to Each Orbit Element)

Input  $\mathbf{x} = (x, y)$

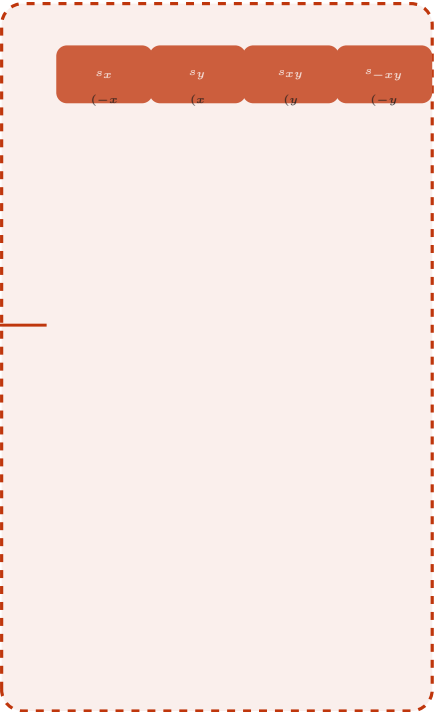

$|D_4| = 8$  orthogonal  $2 \times 2$  matrices

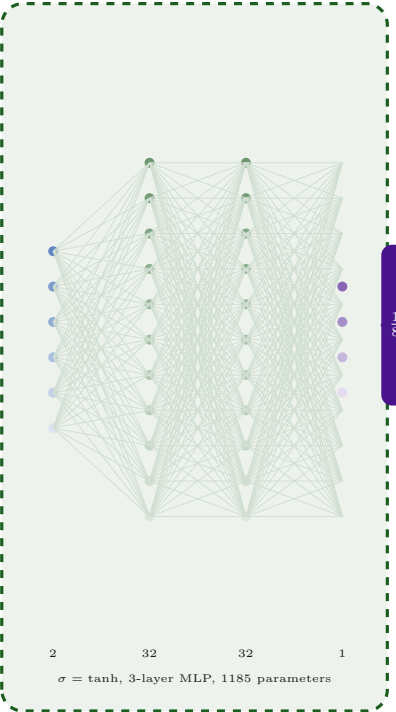

$\sigma = \tanh$ , 3 layers, 1185 params, shared weights

$\frac{1}{8} \sum_{g \in D_4} f_\theta(g \cdot \mathbf{x})$  Reynolds Average

$u_\theta(\mathbf{x})$   $D_4$ -invariant

**Theorem 1:**  $u_\theta(g' \cdot \mathbf{x}) = u_\theta(\mathbf{x}) \quad \forall g' \in D_4, \forall \theta$
