# Supplementary material
Source: Research Square preprint supplement (doi:10.21203/rs.3.rs-9719695/v1)
Supplement: Supplementary file 65 [file fig0_architecture.pdf › d4-pinn/paper/figures/fig0_architecture.pdf]

# $D_4$ -PINN — Hard-Constraint Group-Invariant Architecture

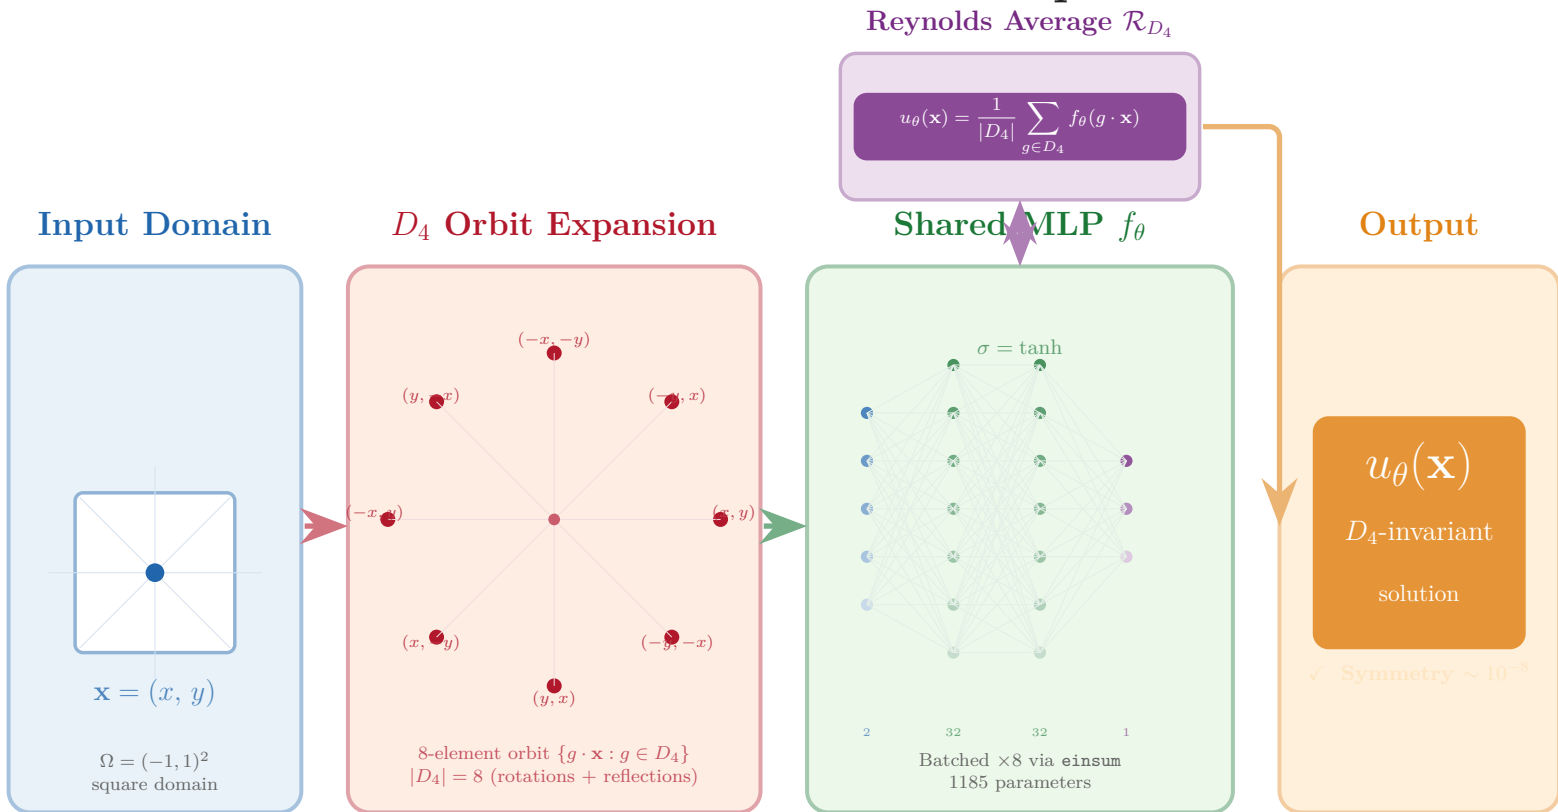

**Proposition 1 (Architectural Invariance):**  $\forall \theta \in \Theta, \forall \mathbf{x} \in \mathbb{R}^2, u_\theta(g' \cdot \mathbf{x}) = u_\theta(\mathbf{x})$  for all  $g' \in D_4$ . • The Reynolds average guarantees exact  $D_4$ -invariance of every forward pass at machine precision.
