# Supplementary material
Source: Research Square preprint supplement (doi:10.21203/rs.3.rs-9719695/v1)
Supplement: Supplementary file 77 [file fig_nn_schematic.pdf › d4-pinn/paper/figures/fig_nn_schematic.pdf]

# $D_4$ -PINN Computational Graph

$D_4$  Orbit Expansion • 8 Transformed Inputs

Shared MLP  $f_\theta$  • Applied to Each Orbit Element

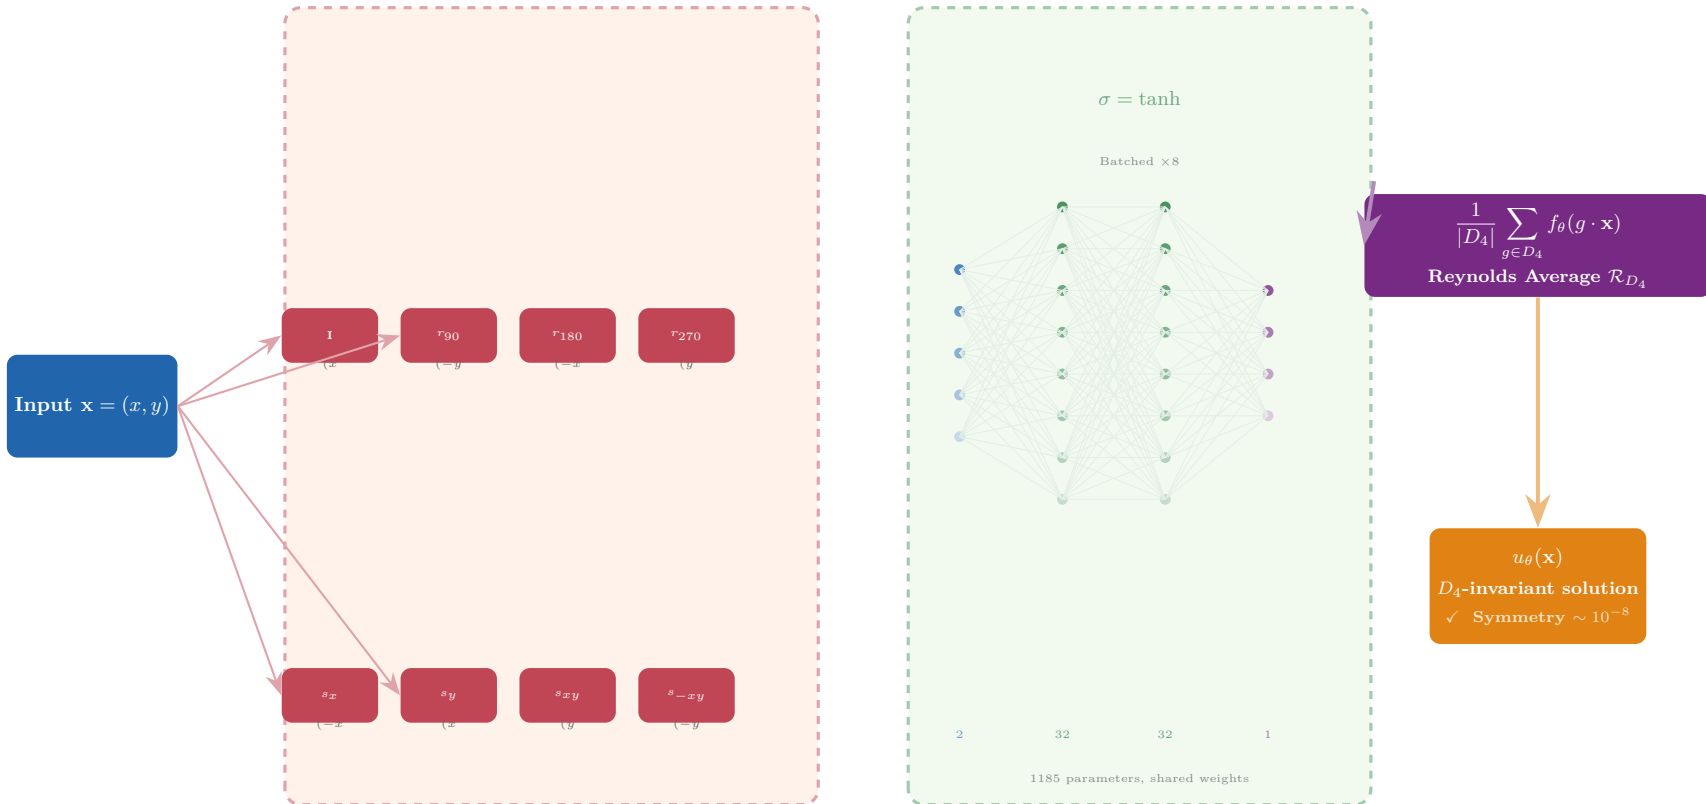

$|D_4| = 8$  orthogonal  $2 \times 2$  matrices (dihedral group of the square)

**Proposition 1 (Architectural  $D_4$ -Invariance):**  $u_\theta(g' \cdot \mathbf{x}) = u_\theta(\mathbf{x}) \quad \forall g' \in D_4, \quad \forall \theta \in \Theta$  • Guaranteed at machine precision ( $\sim 10^{-8}$ ) for every forward pass
