# Supplementary material
Source: Research Square preprint supplement (doi:10.21203/rs.3.rs-9719695/v1)

Soft-constraint  $\lambda_{\text{sym}}$  sweep(a)  $L_2$  error vs.  $\lambda_{\text{sym}}$ 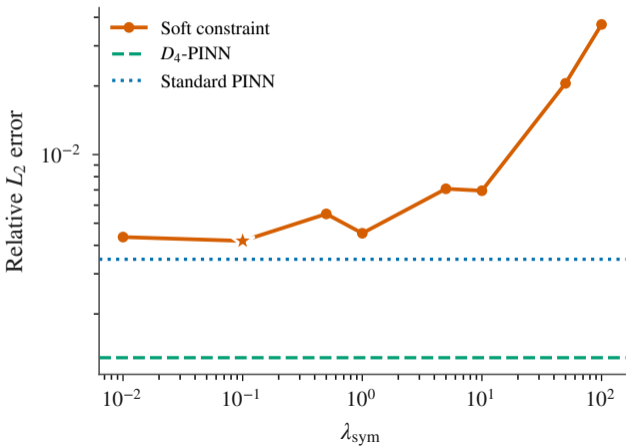(b) Symmetry error vs.  $\lambda_{\text{sym}}$ 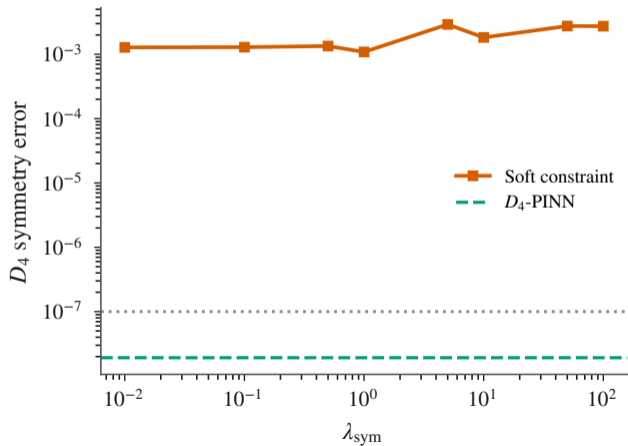

Supplement: Supplementary file 78 [file fig_soft_constraint_sweep.pdf › d4-pinn/paper/figures/fig_soft_constraint_sweep.pdf]
