# Supplementary material
Source: Research Square preprint supplement (doi:10.21203/rs.3.rs-9719695/v1)

(a) Distribution across hyperparameters

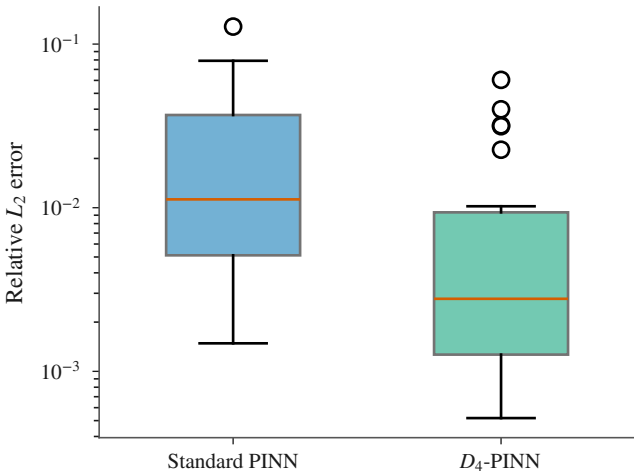

(b) ratio Std /  $D_4$  median  $L_2$

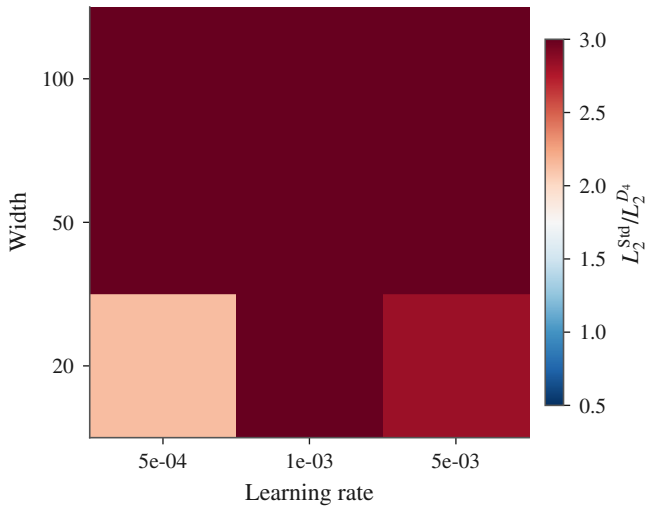

Supplement: Supplementary file 1 [file fig10_hyperparam_robustness.pdf › d4-pinn/output_20260508_215013/figures/fig10_hyperparam_robustness.pdf]

### 3D extension: planar $D_4$ does not constrain $z$

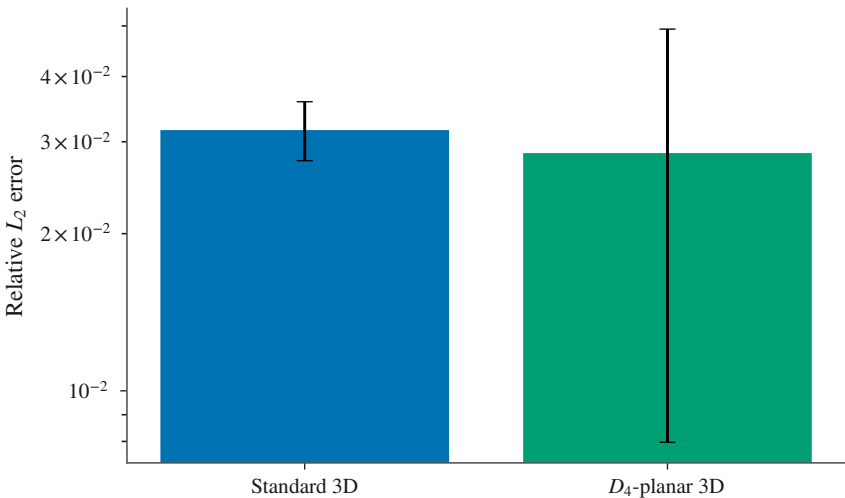

Supplement: Supplementary file 2 [file fig12_3d_extension.pdf › d4-pinn/output_20260508_215013/figures/fig12_3d_extension.pdf]

(a) Inverse problem: parameter recovery

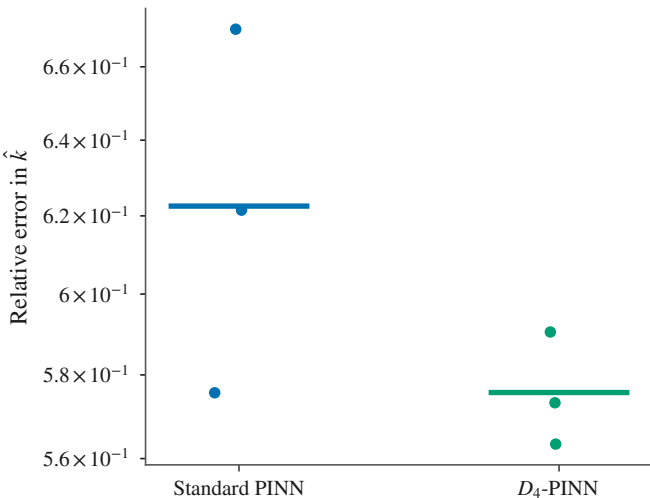

(b) Homotopic vs single-stage  $D_4$

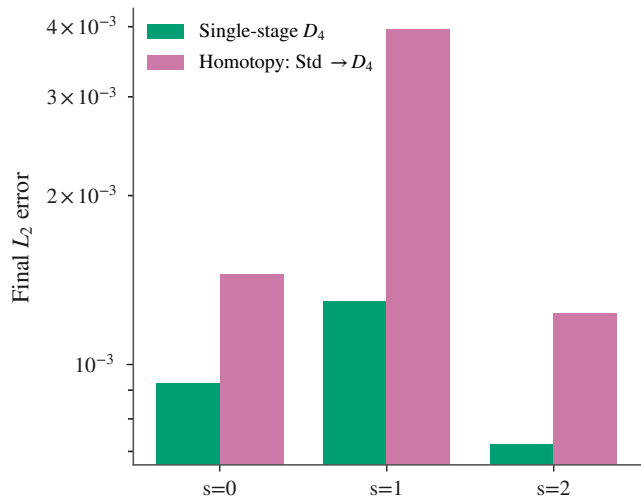

Supplement: Supplementary file 3 [file fig13_inverse_homotopy.pdf › d4-pinn/output_20260508_215013/figures/fig13_inverse_homotopy.pdf]

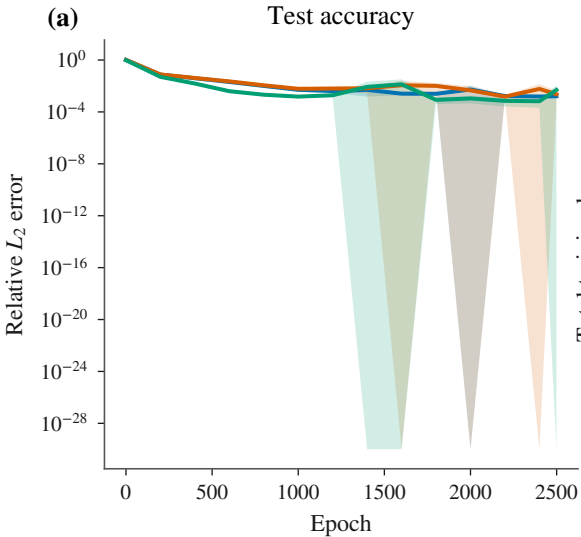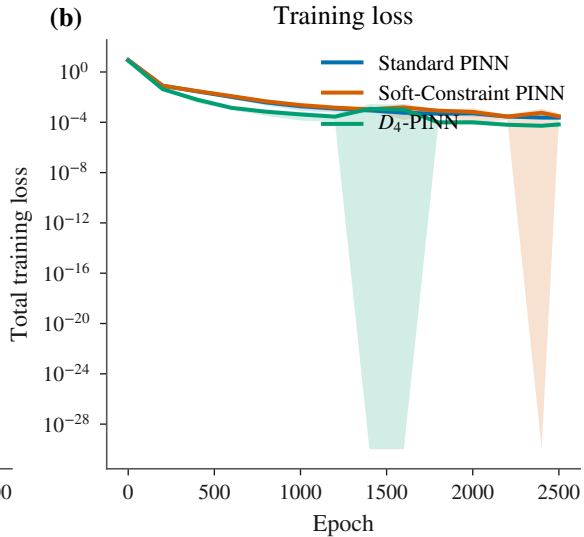

Supplement: Supplementary file 4 [file fig1_convergence.pdf › d4-pinn/output_20260508_215013/figures/fig1_convergence.pdf]

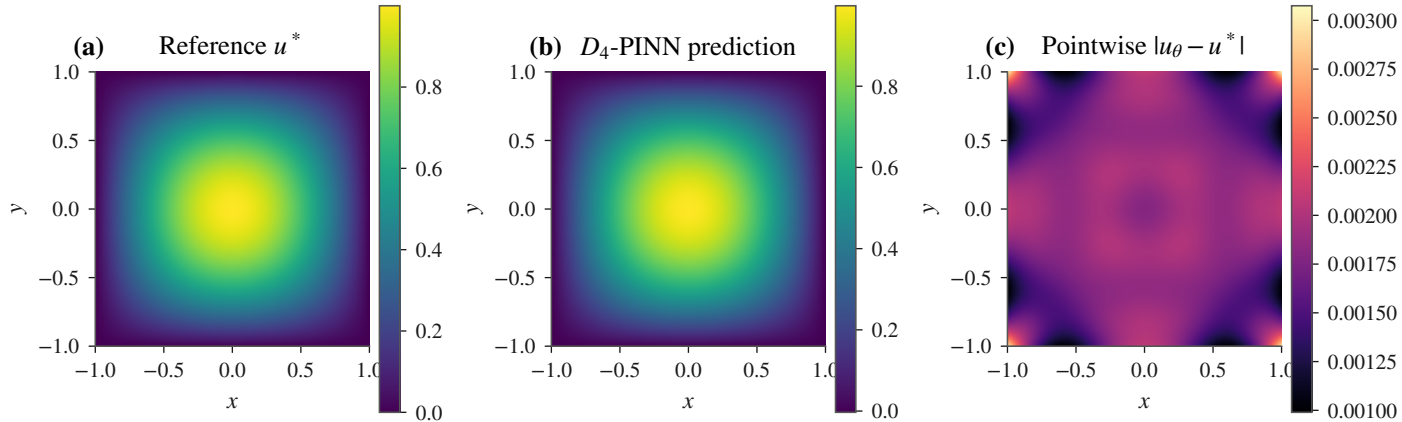

Supplement: Supplementary file 5 [file fig4_solution_field.pdf › d4-pinn/output_20260508_215013/figures/fig4_solution_field.pdf]

# Batched vs sequential $D_4$ averaging

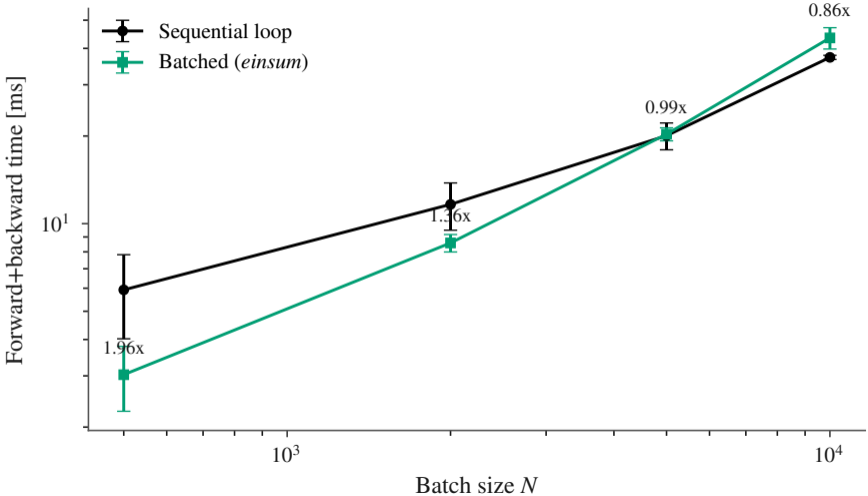

Supplement: Supplementary file 6 [file fig6_batched_speedup.pdf › d4-pinn/output_20260508_215013/figures/fig6_batched_speedup.pdf]

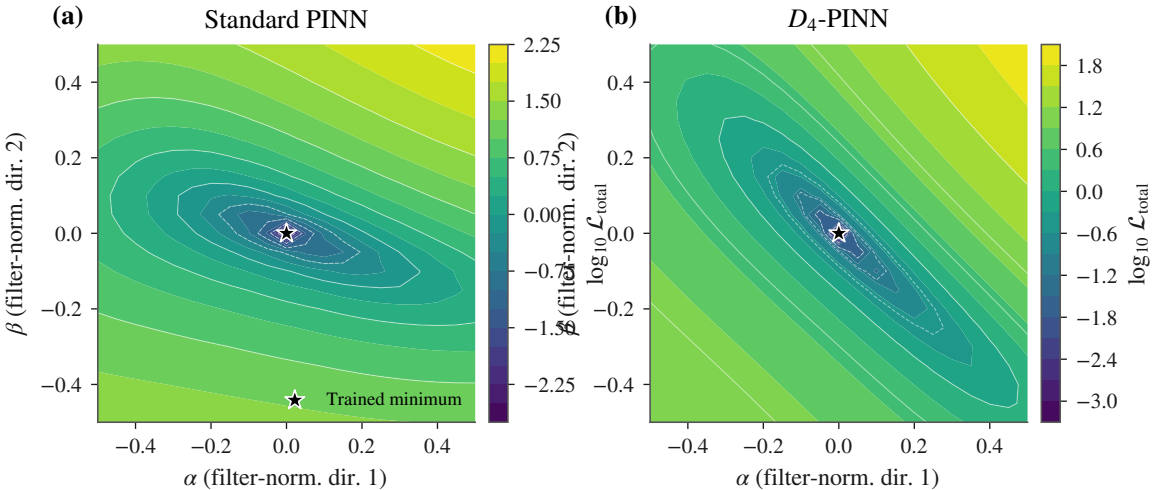

Supplement: Supplementary file 7 [file fig7_loss_landscape.pdf › d4-pinn/output_20260508_215013/figures/fig7_loss_landscape.pdf]

(a) Forward-problem accuracy

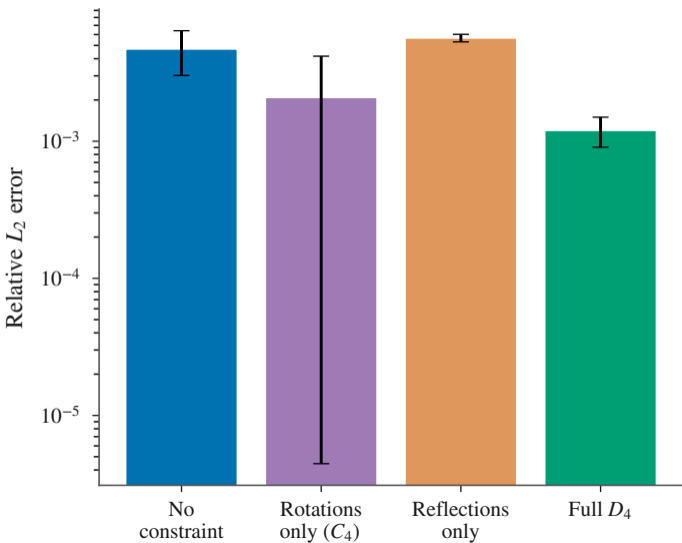

(b) Output symmetry deviation

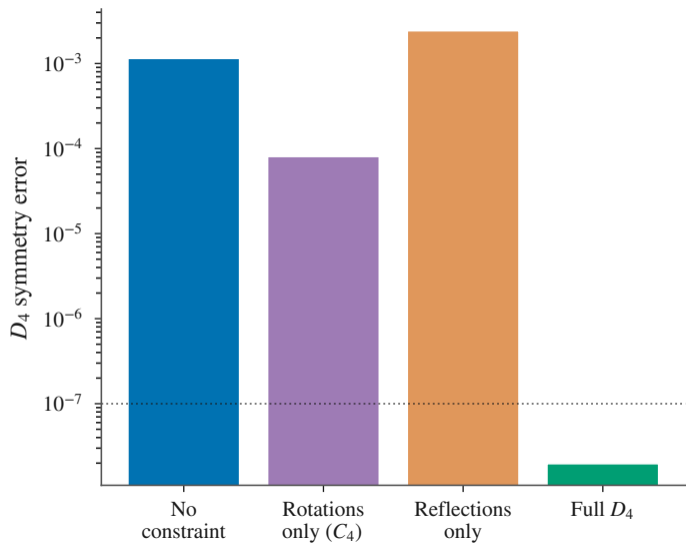

Supplement: Supplementary file 8 [file fig8_ablation.pdf › d4-pinn/output_20260508_215013/figures/fig8_ablation.pdf]

(a) Cubic semilinear:  $-\Delta u + ku^3 = f$

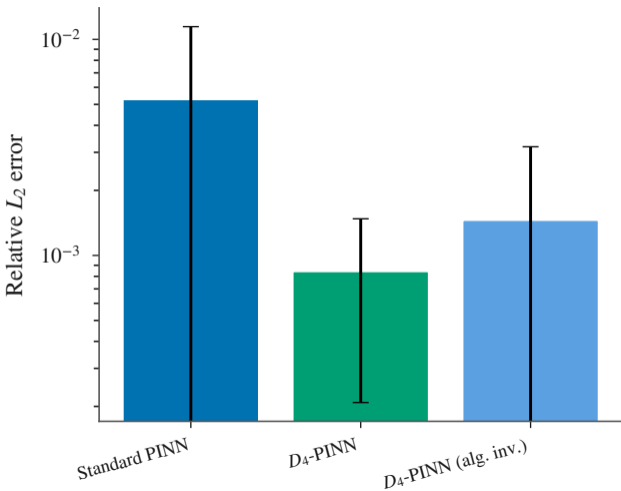

(b) Symmetry deviation

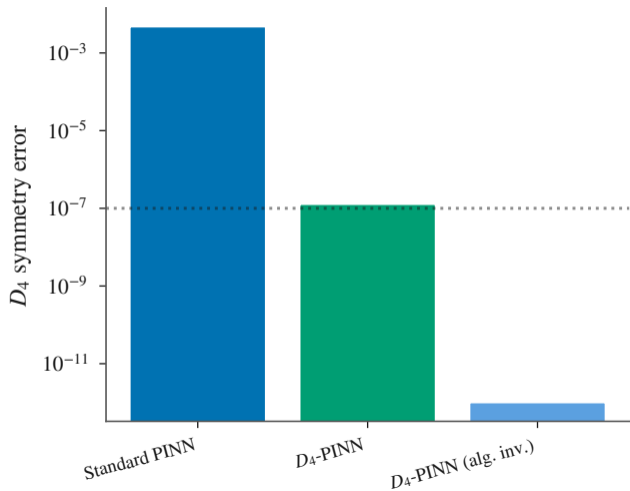

Supplement: Supplementary file 10 [file fig_cubic_semilinear.pdf › d4-pinn/output_20260508_215013/figures/fig_cubic_semilinear.pdf]

(a) Training throughput

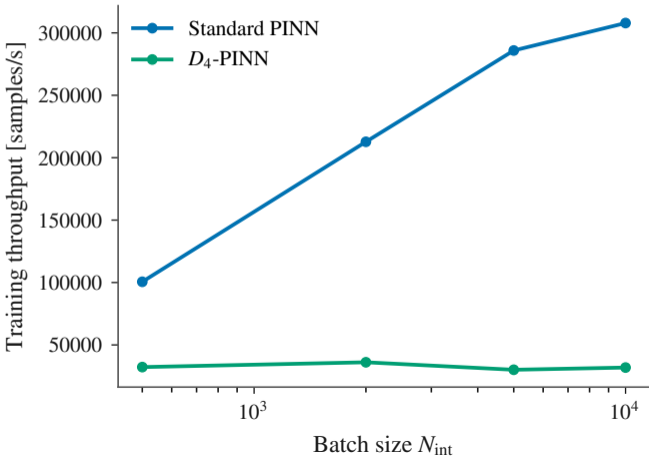

(b) Inference latency

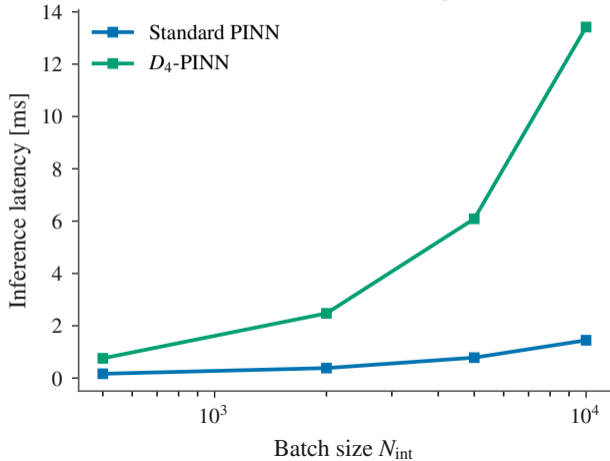

Supplement: Supplementary file 11 [file fig_gpu_benchmark.pdf › d4-pinn/output_20260508_215013/figures/fig_gpu_benchmark.pdf]

(a) Reaction rate  $k$  recovery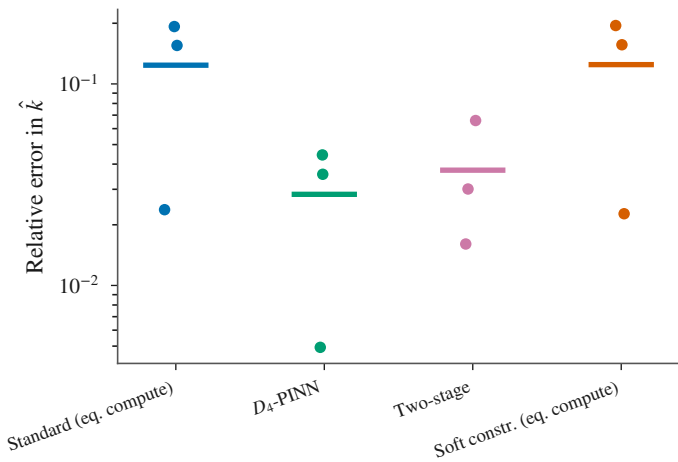(b) Source amplitude  $A$  recovery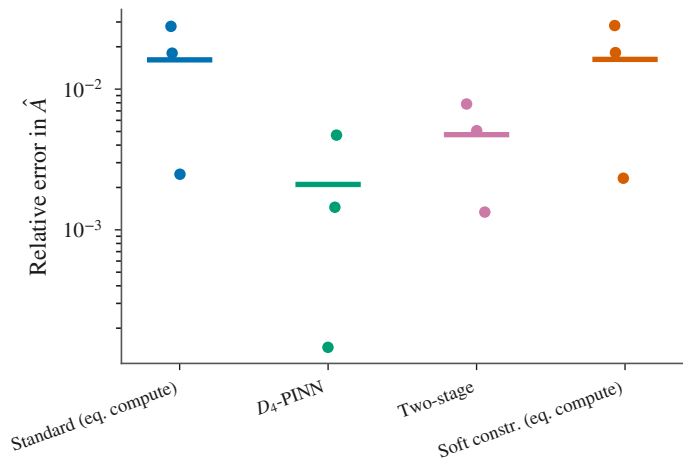(c)  $\hat{k}$  vs.  $k^* = 1$ 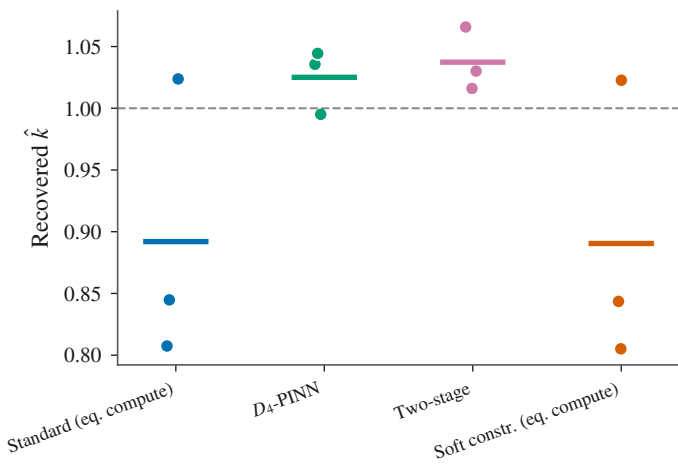

(d) Computational cost

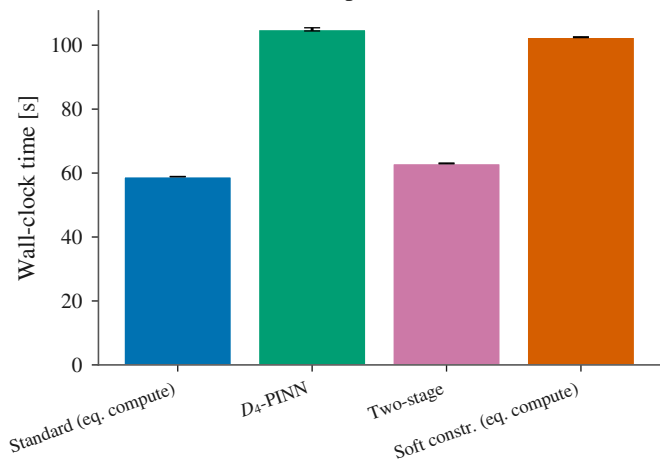

Supplement: Supplementary file 12 [file fig_inverse_revised.pdf › d4-pinn/output_20260508_215013/figures/fig_inverse_revised.pdf]

# Noise robustness

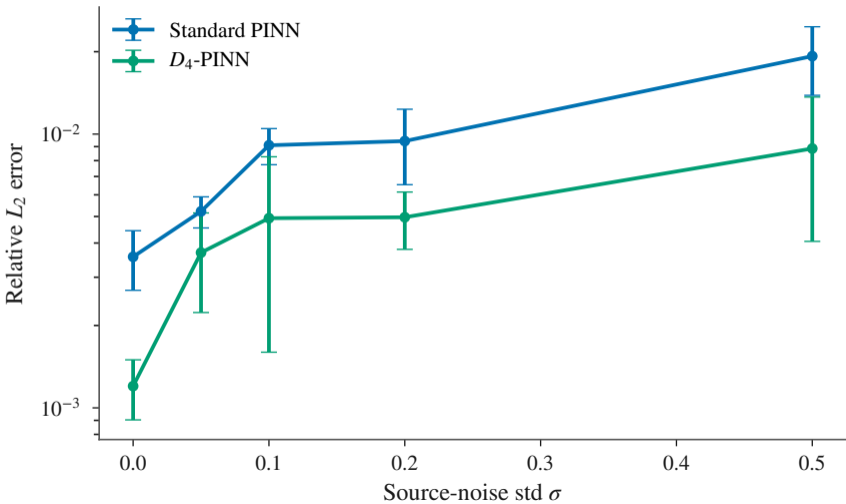

Supplement: Supplementary file 13 [file fig11_noise_robustness.pdf › d4-pinn/output_20260510_125419/figures/fig11_noise_robustness.pdf]

### 3D extension: planar $D_4$ does not constrain $z$



Supplement: Supplementary file 14 [file fig12_3d_extension.pdf › d4-pinn/output_20260510_125419/figures/fig12_3d_extension.pdf]

(a) Inverse problem: parameter recovery



(b) Homotopic vs single-stage  $D_4$



Supplement: Supplementary file 15 [file fig13_inverse_homotopy.pdf › d4-pinn/output_20260510_125419/figures/fig13_inverse_homotopy.pdf]

Final  $L_2$  error per seed (line = mean)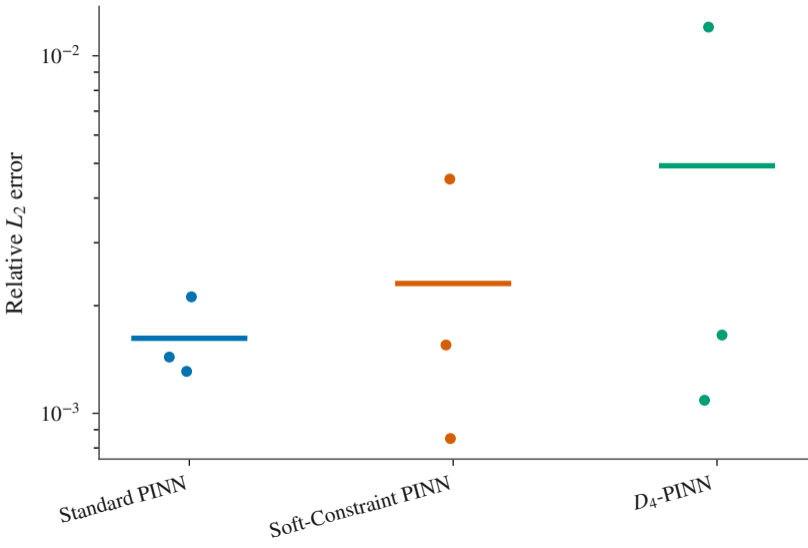

Supplement: Supplementary file 16 [file fig2_l2_vs_seeds.pdf › d4-pinn/output_20260510_125419/figures/fig2_l2_vs_seeds.pdf]

Architectural  $D_4$ -invariance at random initialisation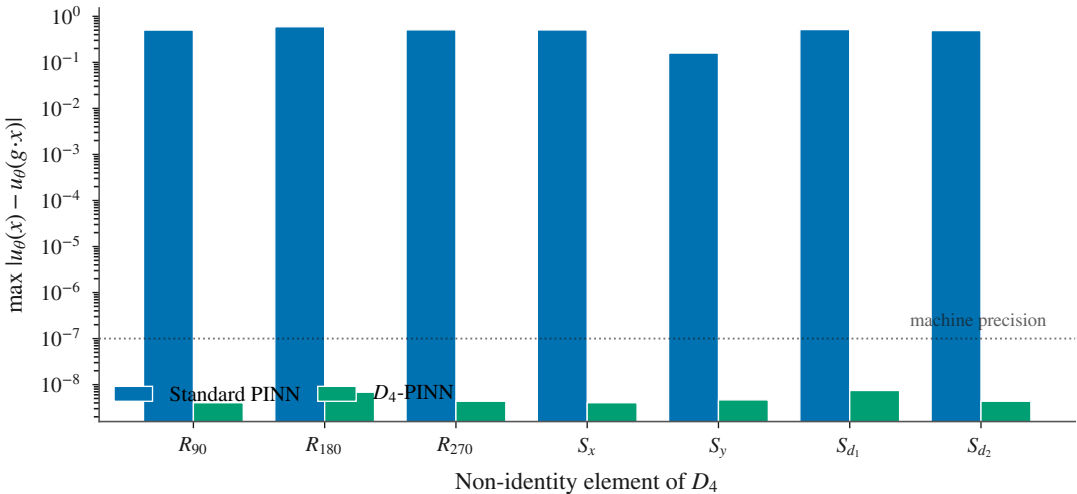

Supplement: Supplementary file 17 [file fig3_symmetry_error_bar.pdf › d4-pinn/output_20260510_125419/figures/fig3_symmetry_error_bar.pdf]

(a) Forward-problem accuracy

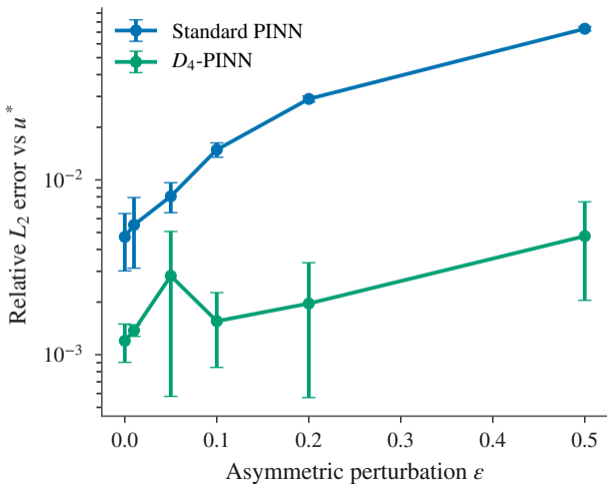

(b) Output symmetry deviation

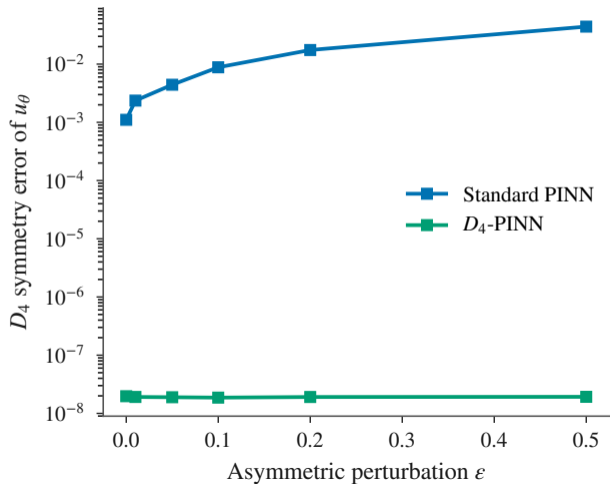

Supplement: Supplementary file 18 [file fig5_symmetry_breaking.pdf › d4-pinn/output_20260510_125419/figures/fig5_symmetry_breaking.pdf]

Batched vs sequential  $D_4$  averaging

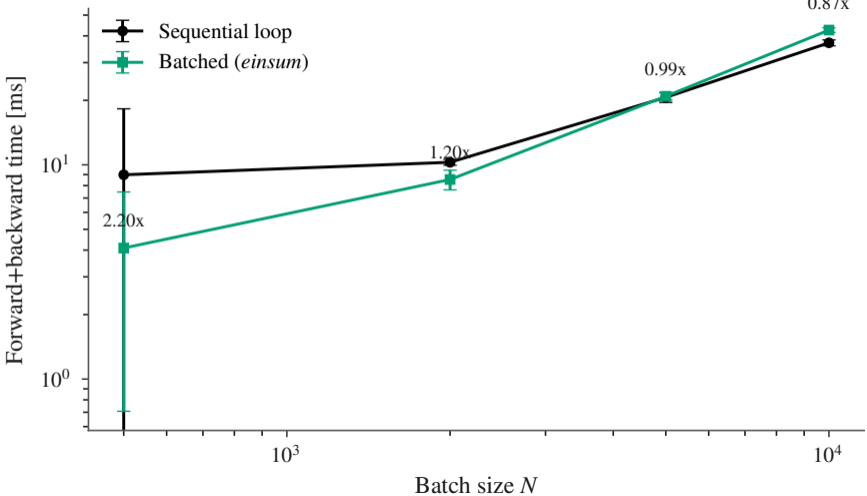

Supplement: Supplementary file 19 [file fig6_batched_speedup.pdf › d4-pinn/output_20260510_125419/figures/fig6_batched_speedup.pdf]

(a) Equal collocation count

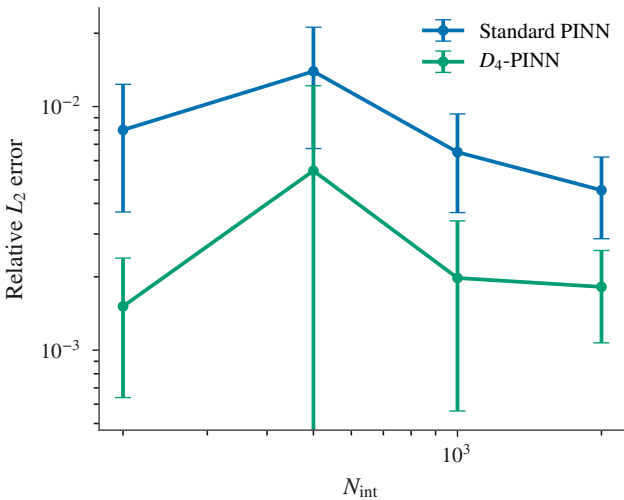

(b) Matched effective sample size

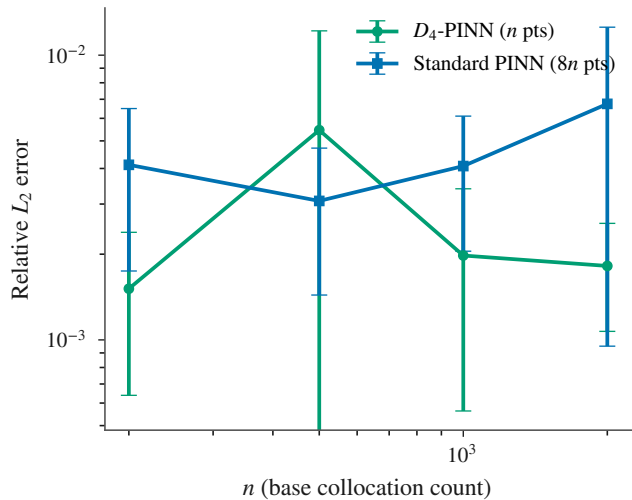

Supplement: Supplementary file 20 [file fig9_sample_efficiency.pdf › d4-pinn/output_20260510_125419/figures/fig9_sample_efficiency.pdf]

$$\text{Allen--Cahn equation: } \varepsilon^2 \Delta u + u - u^3 = 0$$

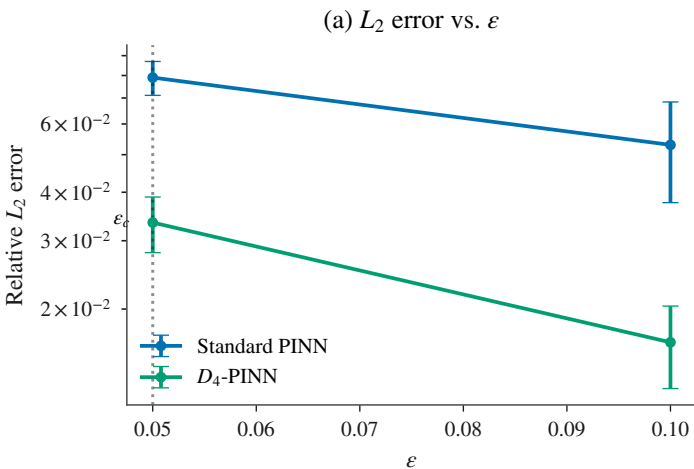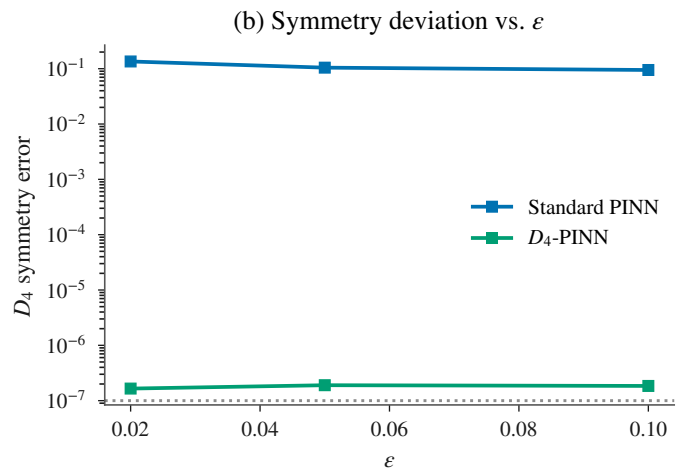

(c)  $\varepsilon = 0.02$ : symmetry-breaking regime

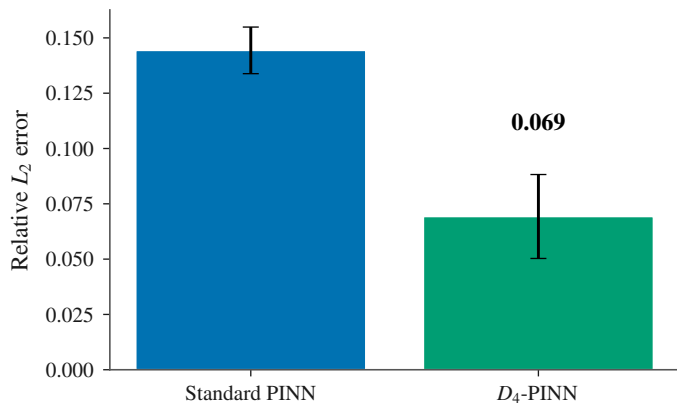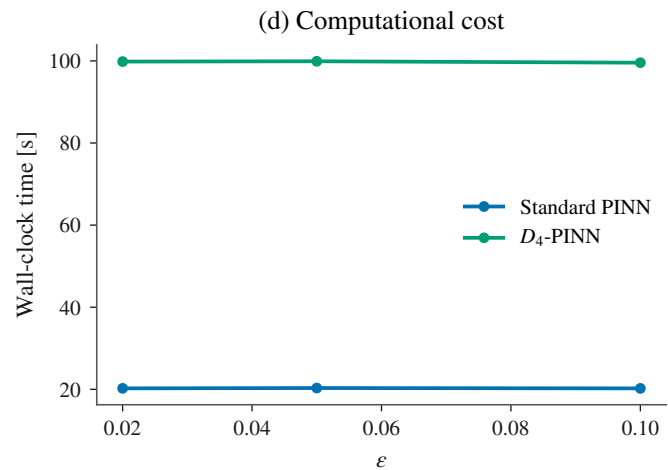

Supplement: Supplementary file 21 [file fig_allen_cahn.pdf › d4-pinn/output_20260510_125419/figures/fig_allen_cahn.pdf]

## GPU benchmark (device=cpu)

(a) Training throughput

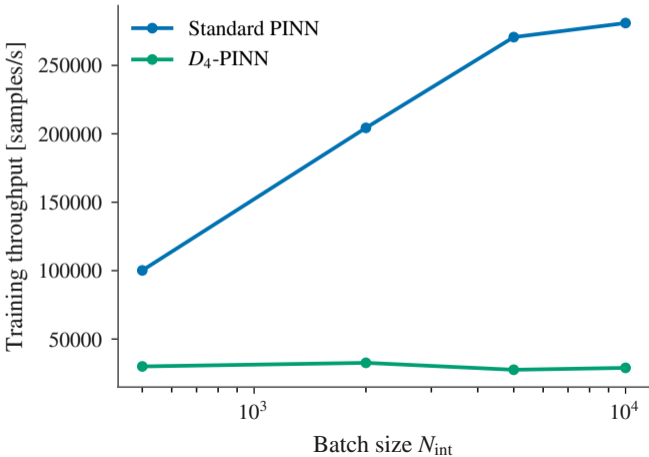

(b) Inference latency

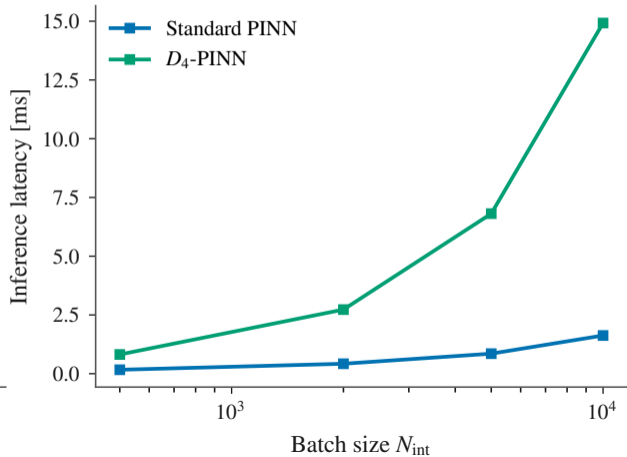

Supplement: Supplementary file 22 [file fig_gpu_benchmark.pdf › d4-pinn/output_20260510_125419/figures/fig_gpu_benchmark.pdf]

(a) Forward-problem accuracy

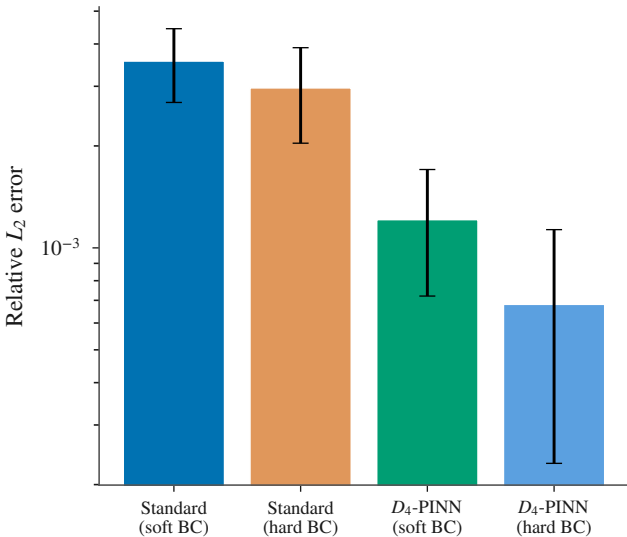

(b) Boundary-condition error

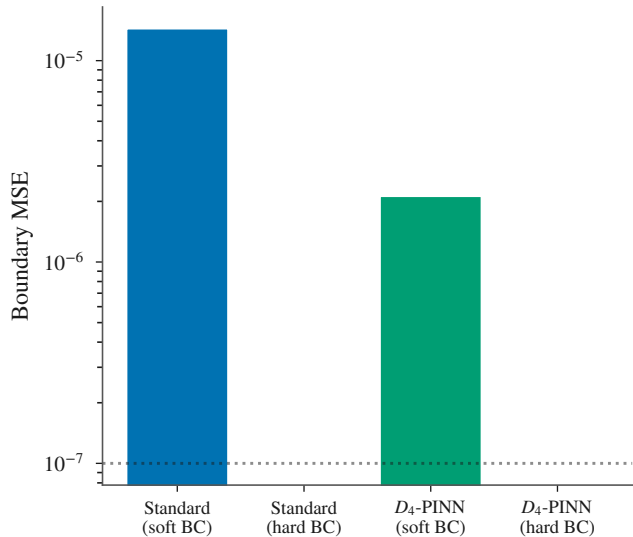

Supplement: Supplementary file 23 [file fig_hard_bc.pdf › d4-pinn/output_20260510_125419/figures/fig_hard_bc.pdf]

(a) Reaction rate  $k$  recovery(b) Source amplitude  $A$  recovery(c)  $\hat{k}$  vs.  $k^* = 1$ 

(d) Computational cost

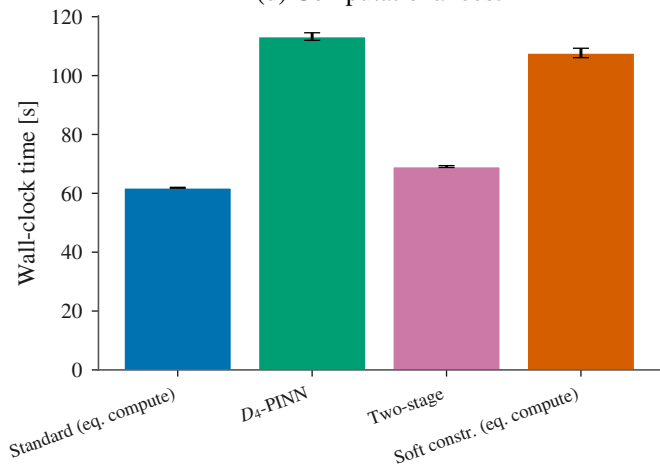

Supplement: Supplementary file 24 [file fig_inverse_revised.pdf › d4-pinn/output_20260510_125419/figures/fig_inverse_revised.pdf]

(a) Distribution across hyperparameters

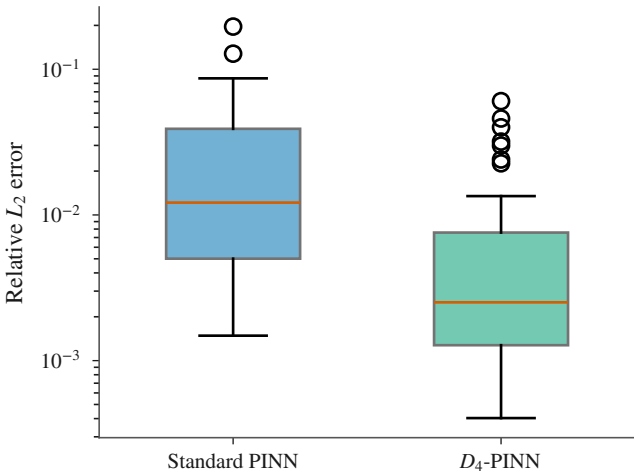

(b) ratio Std /  $D_4$  median  $L_2$

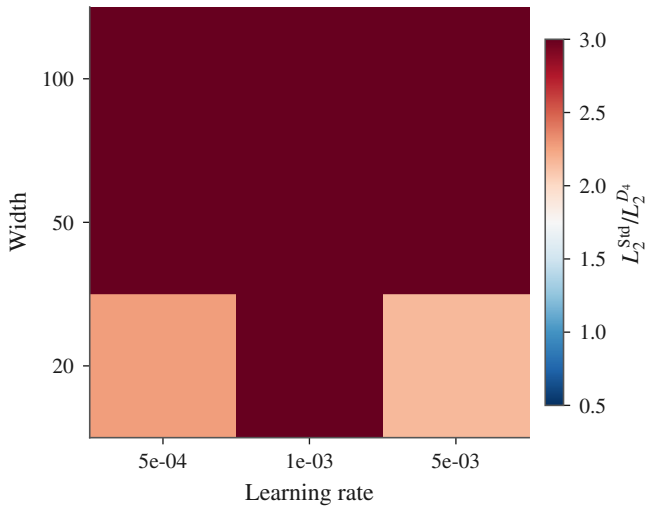

Supplement: Supplementary file 26 [file fig10_hyperparam_robustness.pdf › d4-pinn/output_20260510_180204/figures/fig10_hyperparam_robustness.pdf]

# Noise robustness

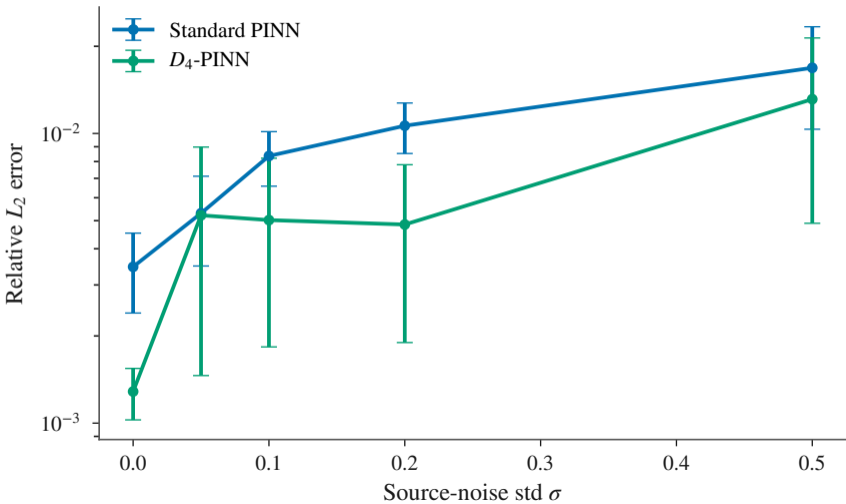

Supplement: Supplementary file 27 [file fig11_noise_robustness.pdf › d4-pinn/output_20260510_180204/figures/fig11_noise_robustness.pdf]

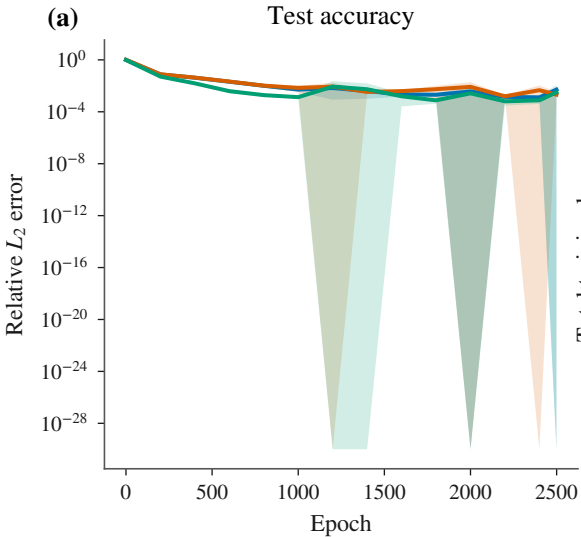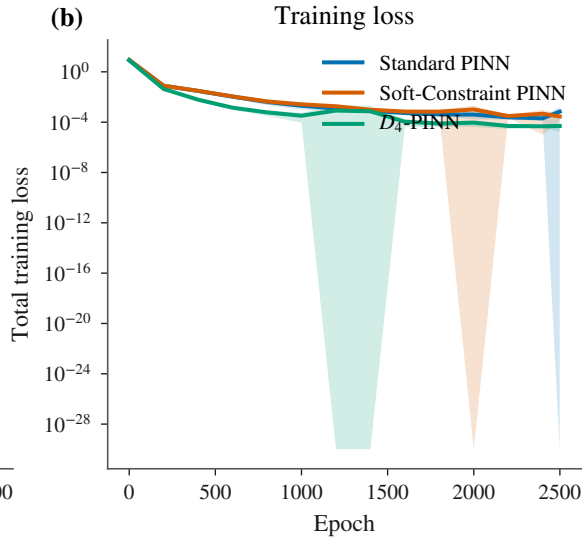

Supplement: Supplementary file 28 [file fig1_convergence.pdf › d4-pinn/output_20260510_180204/figures/fig1_convergence.pdf]

Final  $L_2$  error per seed (line = mean)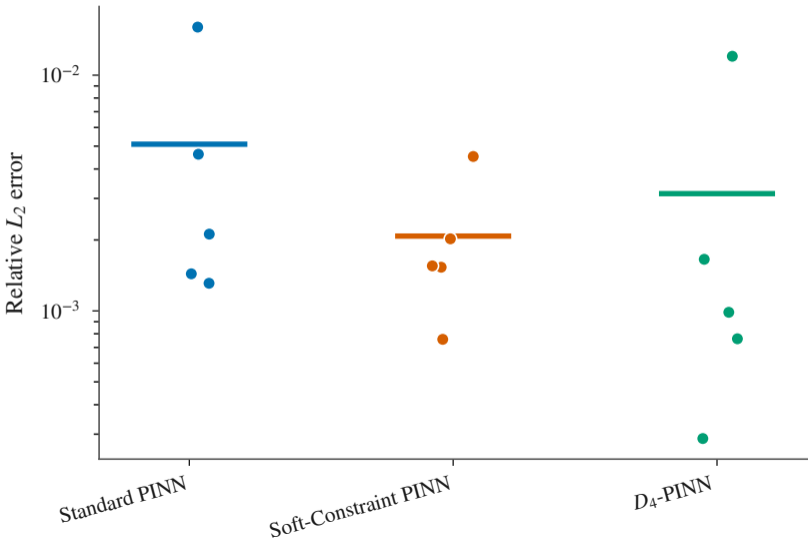

Supplement: Supplementary file 29 [file fig2_l2_vs_seeds.pdf › d4-pinn/output_20260510_180204/figures/fig2_l2_vs_seeds.pdf]

Architectural  $D_4$ -invariance at random initialisation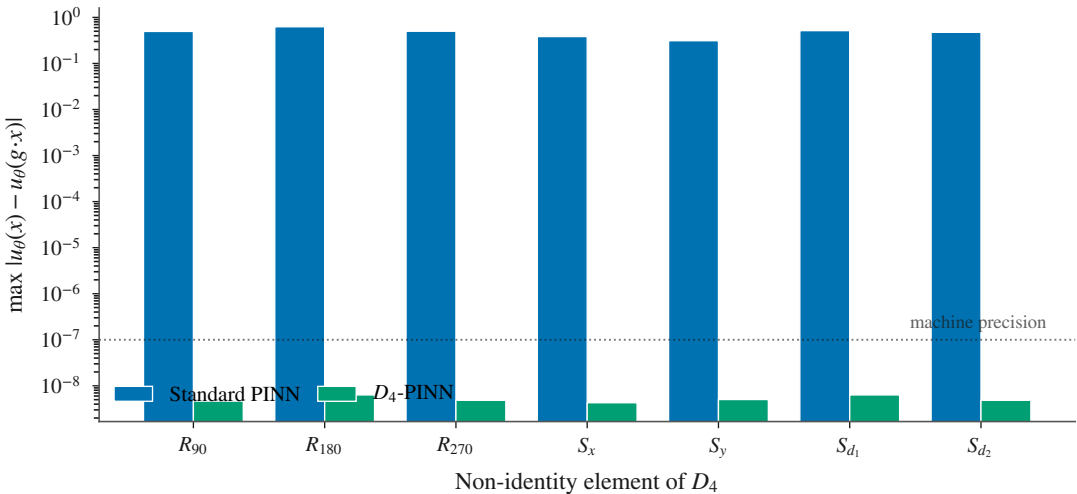

Supplement: Supplementary file 30 [file fig3_symmetry_error_bar.pdf › d4-pinn/output_20260510_180204/figures/fig3_symmetry_error_bar.pdf]

(a) Forward-problem accuracy

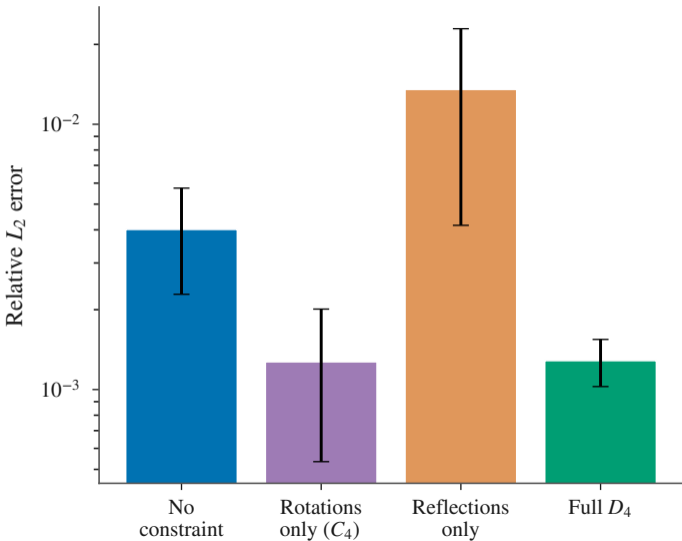

(b) Output symmetry deviation

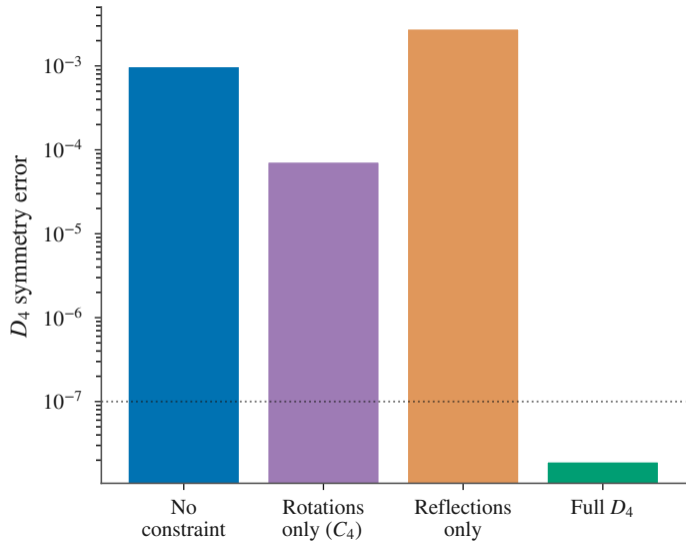

Supplement: Supplementary file 31 [file fig8_ablation.pdf › d4-pinn/output_20260510_180204/figures/fig8_ablation.pdf]

(a) Cubic semilinear:  $-\Delta u + ku^3 = f$

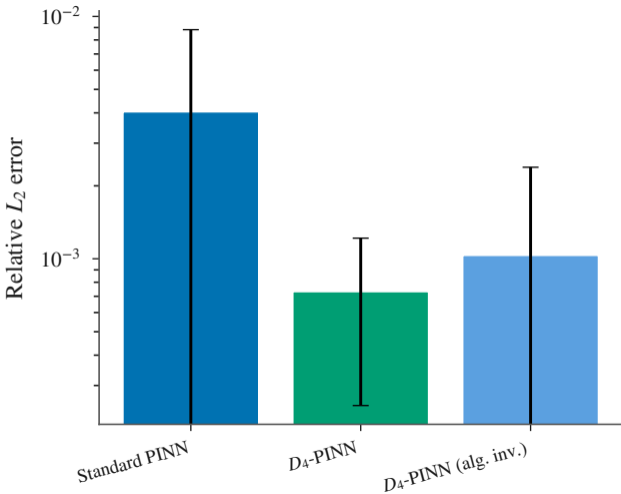

(b) Symmetry deviation

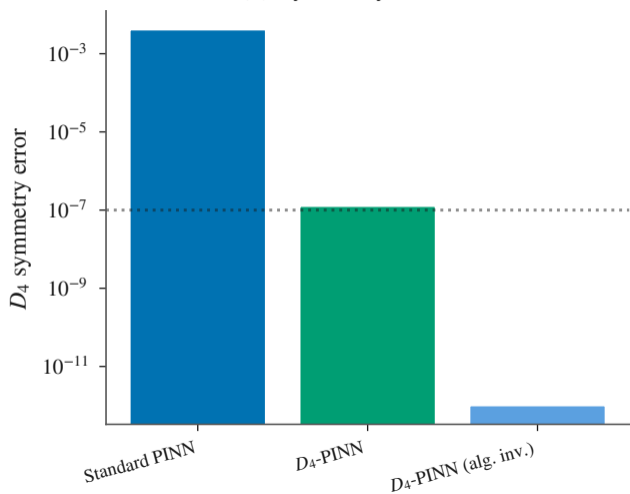

Supplement: Supplementary file 32 [file fig_cubic_semilinear.pdf › d4-pinn/output_20260510_180204/figures/fig_cubic_semilinear.pdf]

(a) Forward-problem accuracy

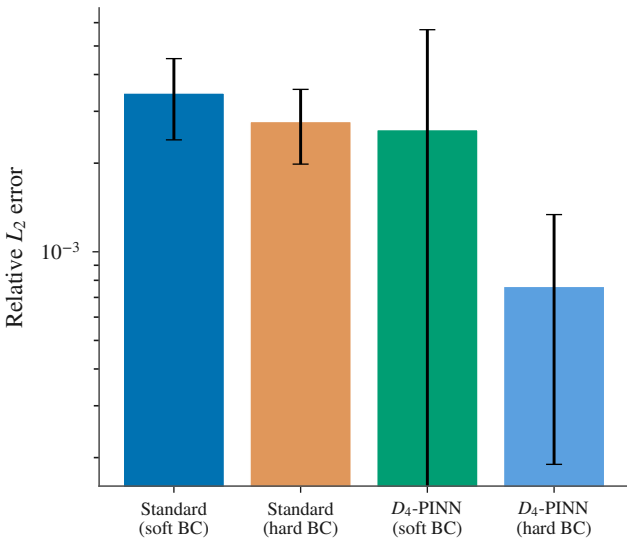

(b) Boundary-condition error

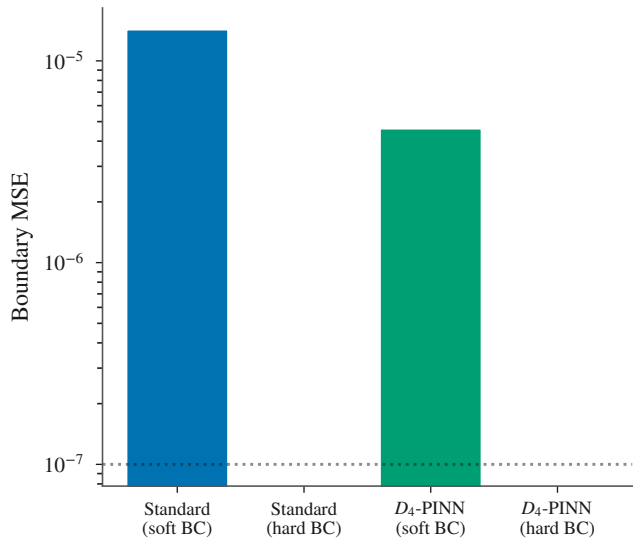

Supplement: Supplementary file 33 [file fig_hard_bc.pdf › d4-pinn/output_20260510_180204/figures/fig_hard_bc.pdf]

(a) Reaction rate  $k$  recovery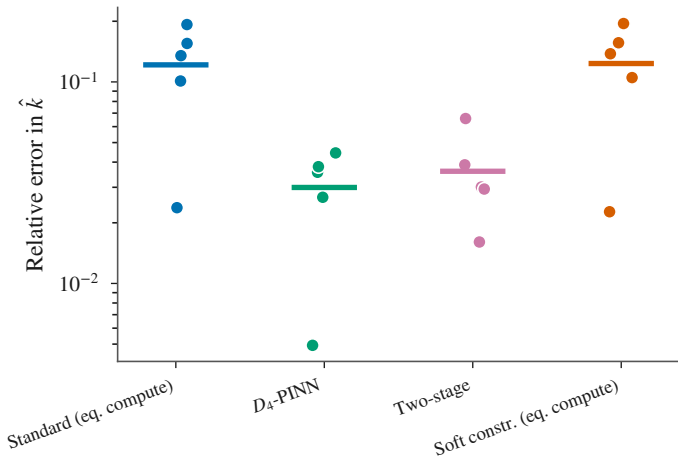(b) Source amplitude  $A$  recovery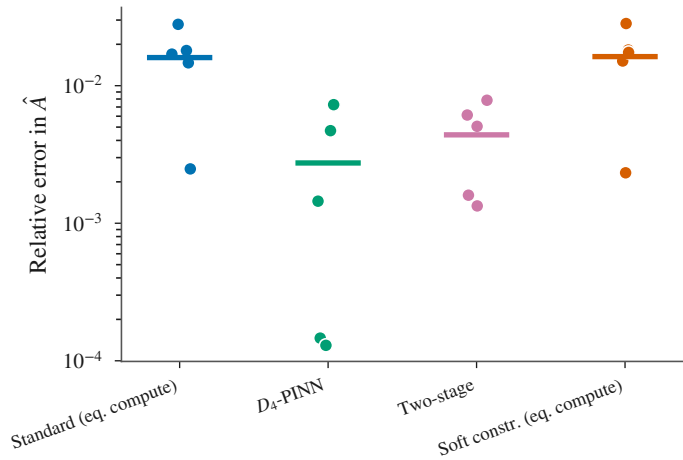(c)  $\hat{k}$  vs.  $k^* = 1$ 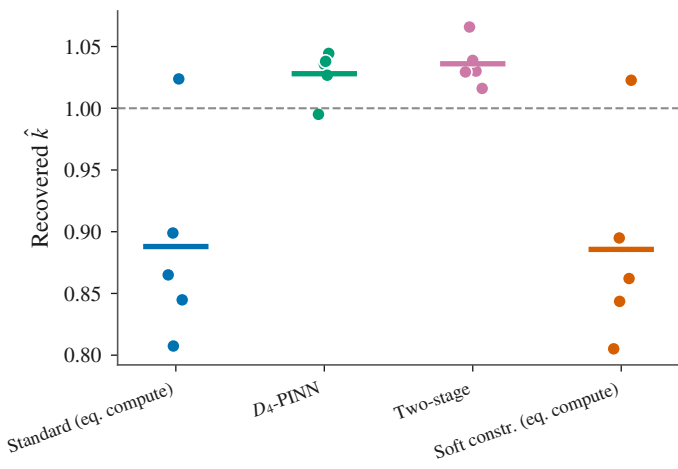

(d) Computational cost

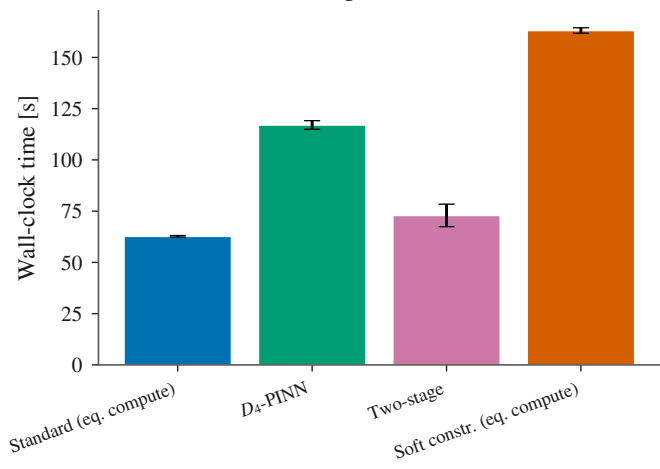

Supplement: Supplementary file 34 [file fig_inverse_revised.pdf › d4-pinn/output_20260510_180204/figures/fig_inverse_revised.pdf]

(a) Distribution across hyperparameters

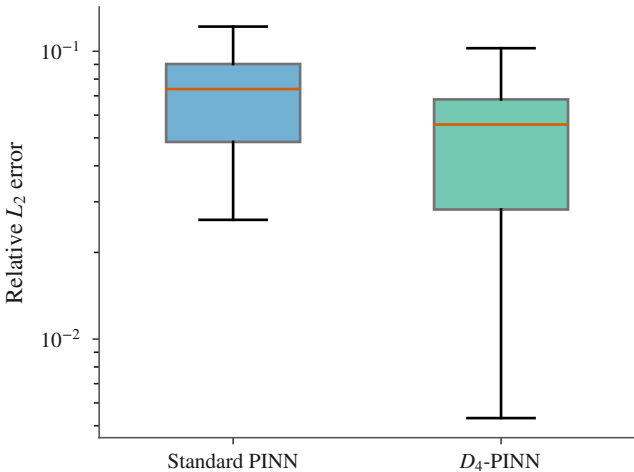

(b) ratio Std /  $D_4$  median  $L_2$

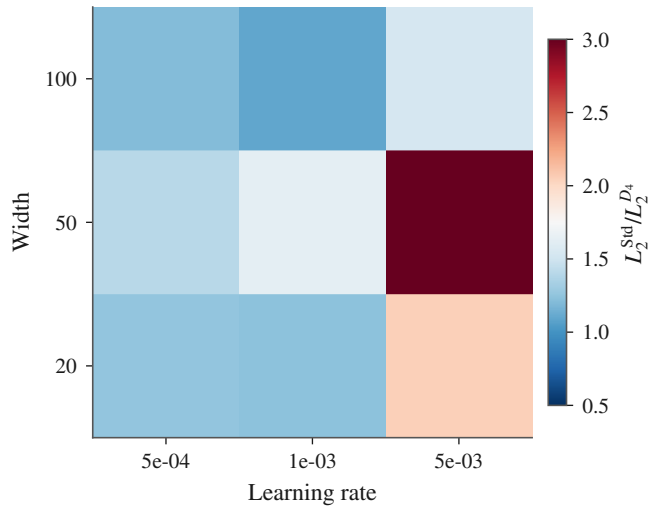

Supplement: Supplementary file 36 [file fig10_hyperparam_robustness.pdf › d4-pinn/output_demo/figures/fig10_hyperparam_robustness.pdf]

## Noise robustness

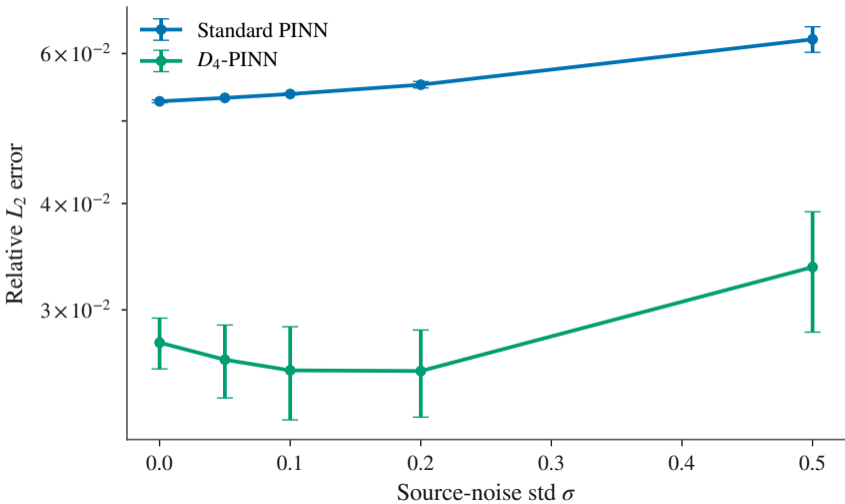

Supplement: Supplementary file 37 [file fig11_noise_robustness.pdf › d4-pinn/output_demo/figures/fig11_noise_robustness.pdf]

### 3D extension: planar $D_4$ does not constrain $z$

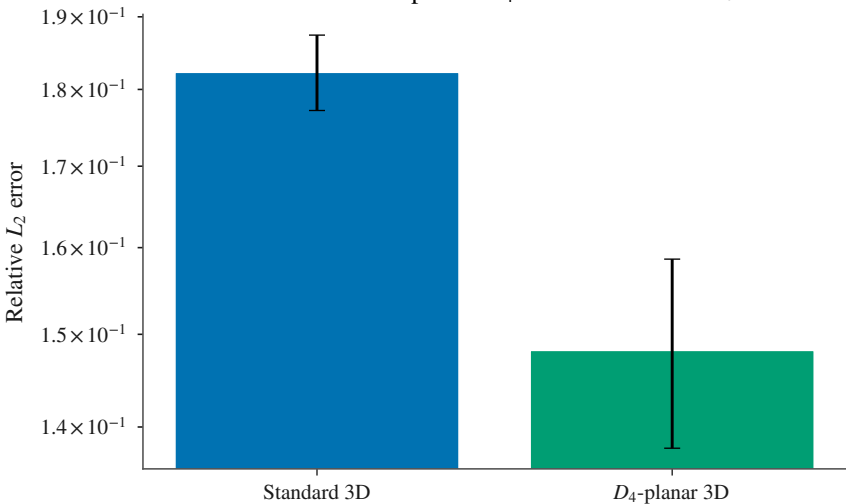

Supplement: Supplementary file 38 [file fig12_3d_extension.pdf › d4-pinn/output_demo/figures/fig12_3d_extension.pdf]

(a) Inverse problem: parameter recovery

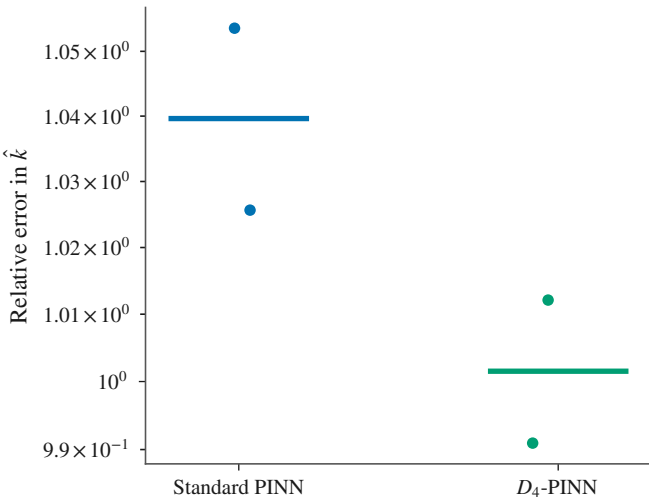

(b) Homotopic vs single-stage  $D_4$

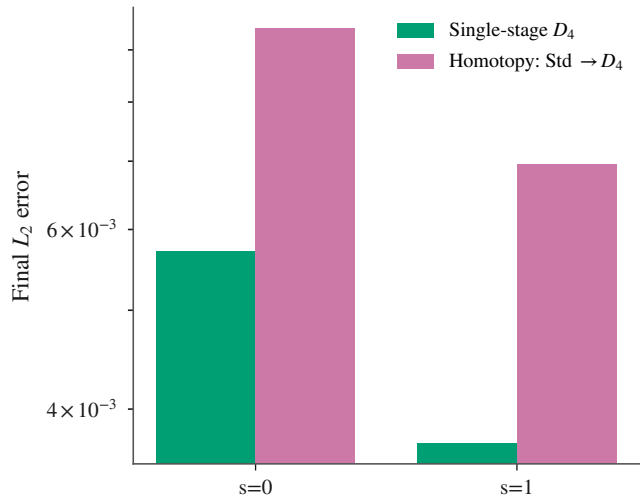

Supplement: Supplementary file 39 [file fig13_inverse_homotopy.pdf › d4-pinn/output_demo/figures/fig13_inverse_homotopy.pdf]

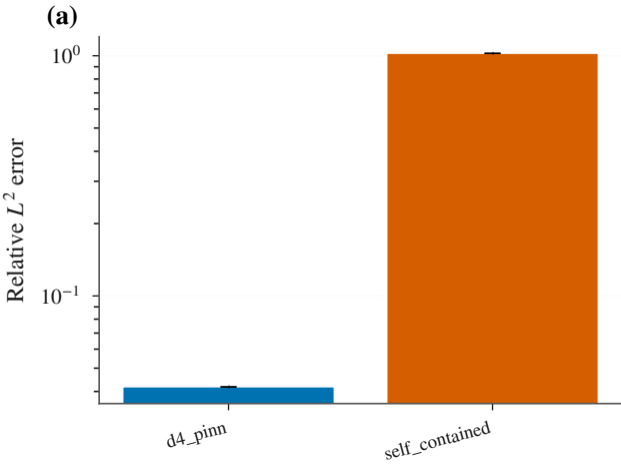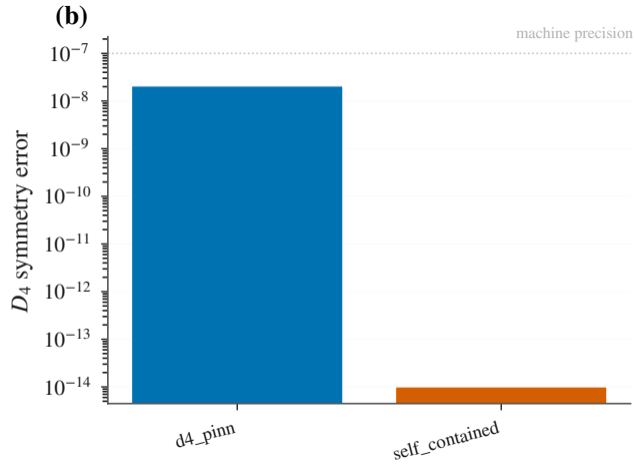

Supplement: Supplementary file 40 [file fig14_escnn_baseline.pdf › d4-pinn/output_demo/figures/fig14_escnn_baseline.pdf]

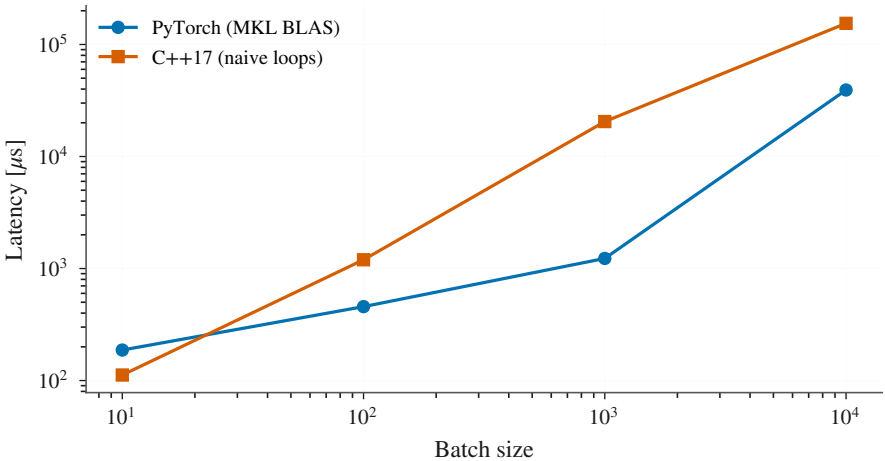

Supplement: Supplementary file 41 [file fig15_cpp_latency.pdf › d4-pinn/output_demo/figures/fig15_cpp_latency.pdf]

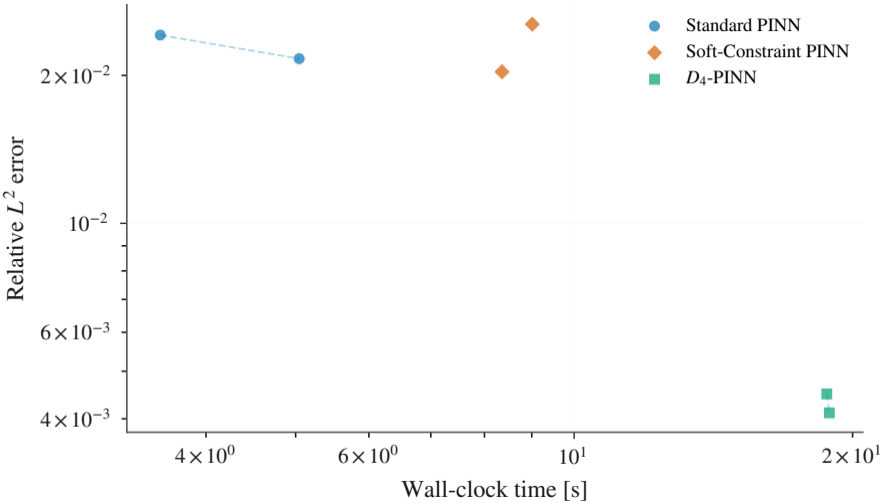

Supplement: Supplementary file 42 [file fig16_wallclock_equalised.pdf › d4-pinn/output_demo/figures/fig16_wallclock_equalised.pdf]

**(a) Forward-problem accuracy**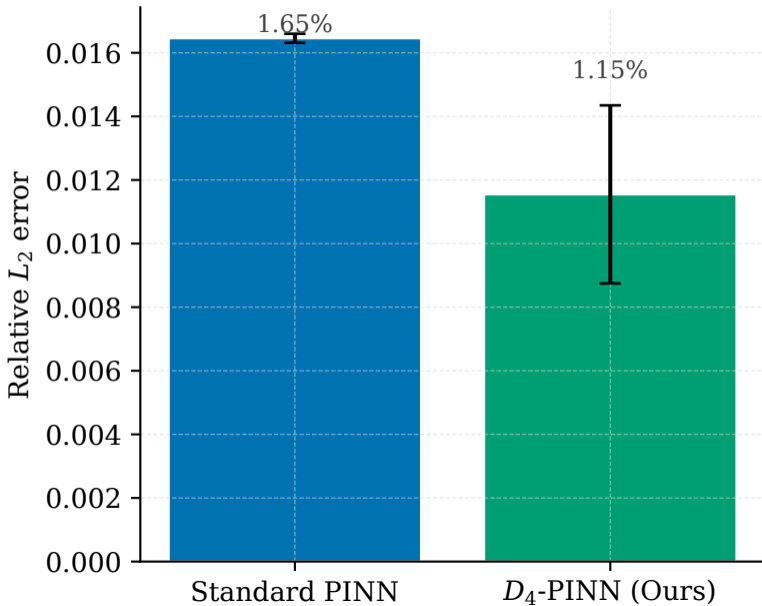**(b) Output symmetry deviation**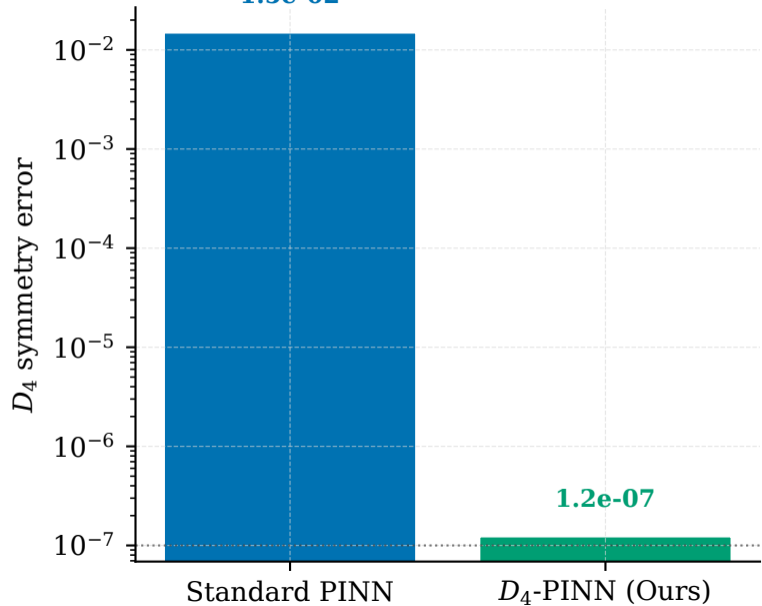

Supplement: Supplementary file 43 [file fig18_heat_metrics.pdf › d4-pinn/output_demo/figures/fig18_heat_metrics.pdf]

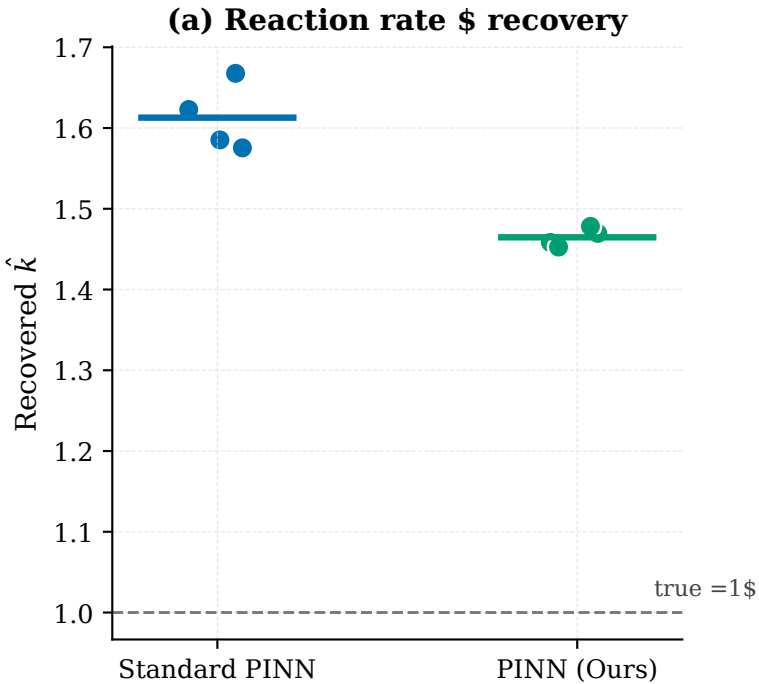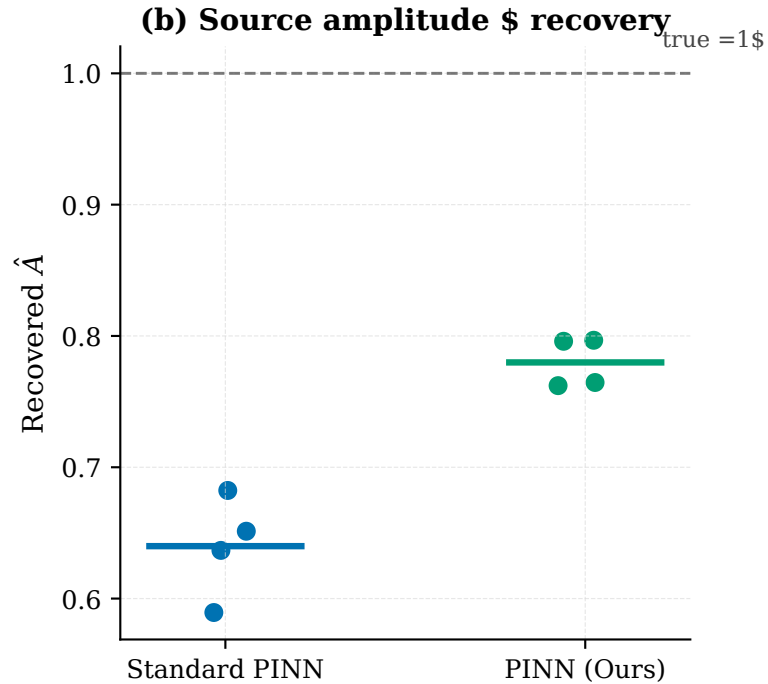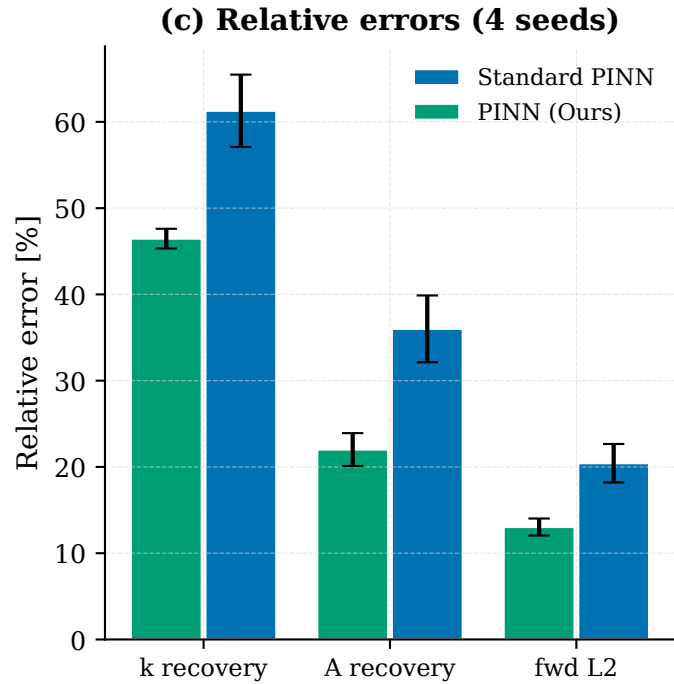

Supplement: Supplementary file 44 [file fig19_inverse_2param.pdf › d4-pinn/output_demo/figures/fig19_inverse_2param.pdf]

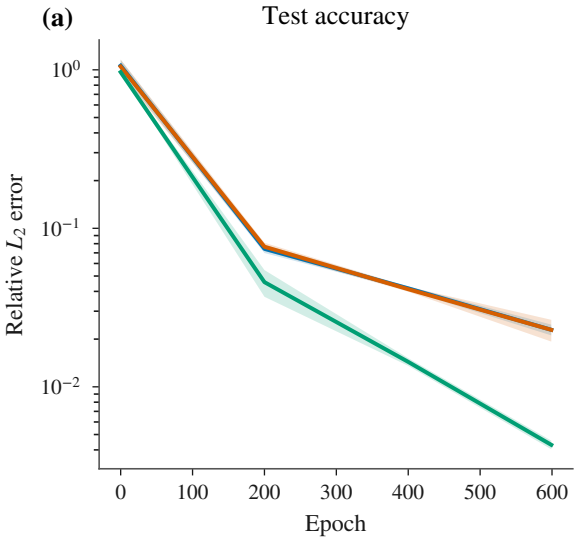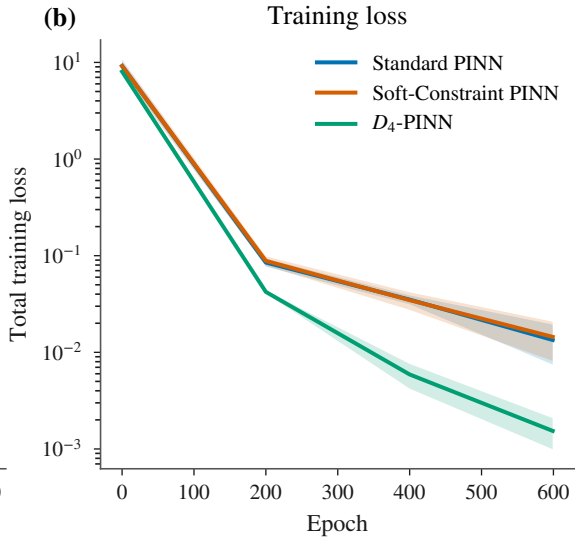

Supplement: Supplementary file 45 [file fig1_convergence.pdf › d4-pinn/output_demo/figures/fig1_convergence.pdf]

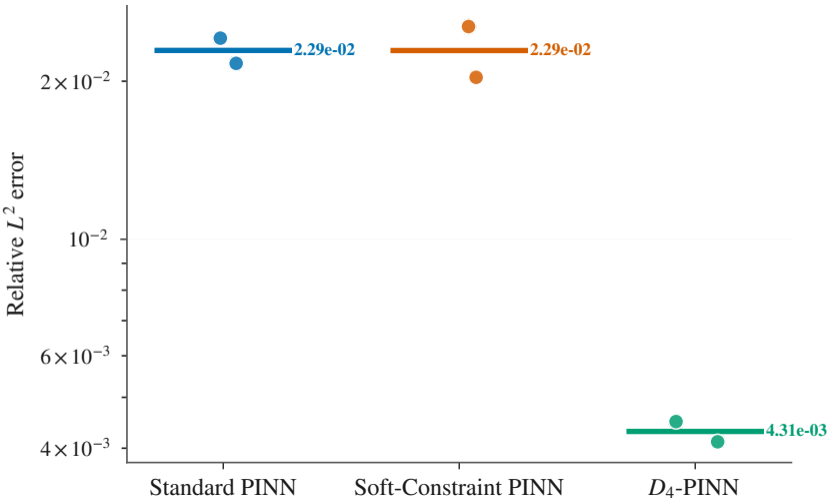

Supplement: Supplementary file 46 [file fig2_l2_vs_seeds.pdf › d4-pinn/output_demo/figures/fig2_l2_vs_seeds.pdf]

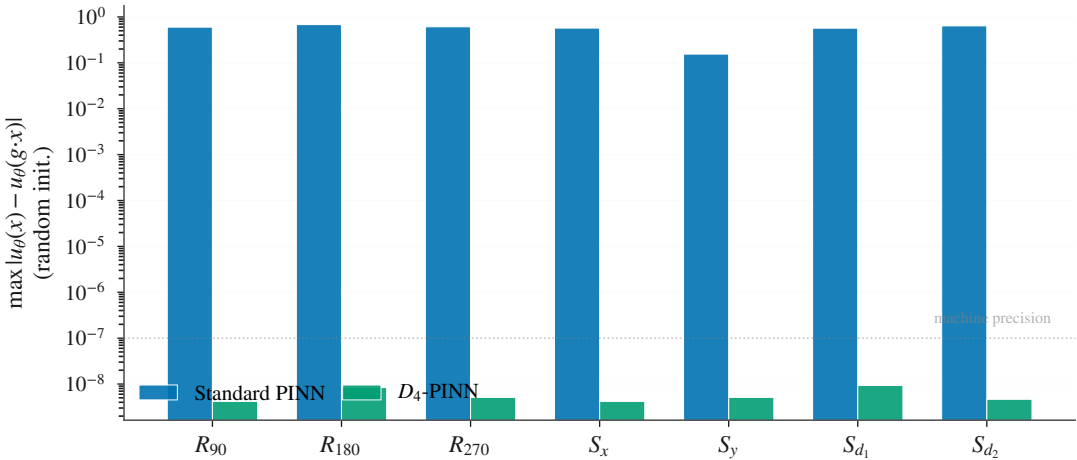

Supplement: Supplementary file 47 [file fig3_symmetry_error_bar.pdf › d4-pinn/output_demo/figures/fig3_symmetry_error_bar.pdf]

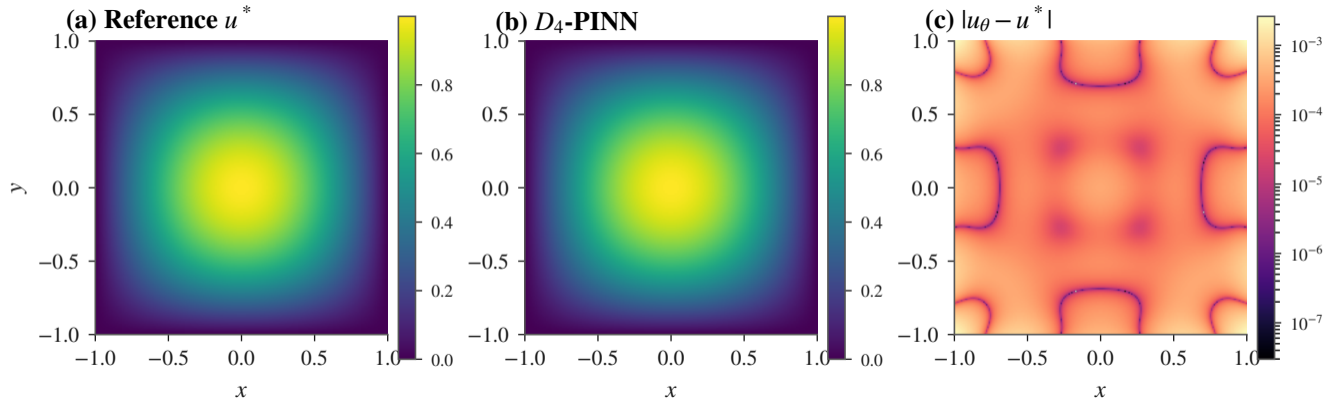

Supplement: Supplementary file 48 [file fig4_solution_field.pdf › d4-pinn/output_demo/figures/fig4_solution_field.pdf]

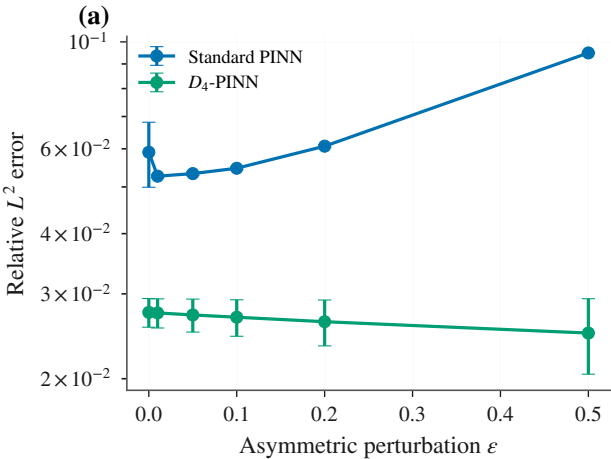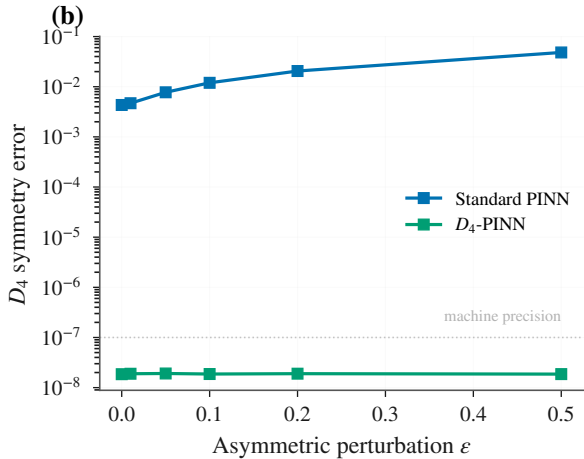

Supplement: Supplementary file 49 [file fig5_symmetry_breaking.pdf › d4-pinn/output_demo/figures/fig5_symmetry_breaking.pdf]

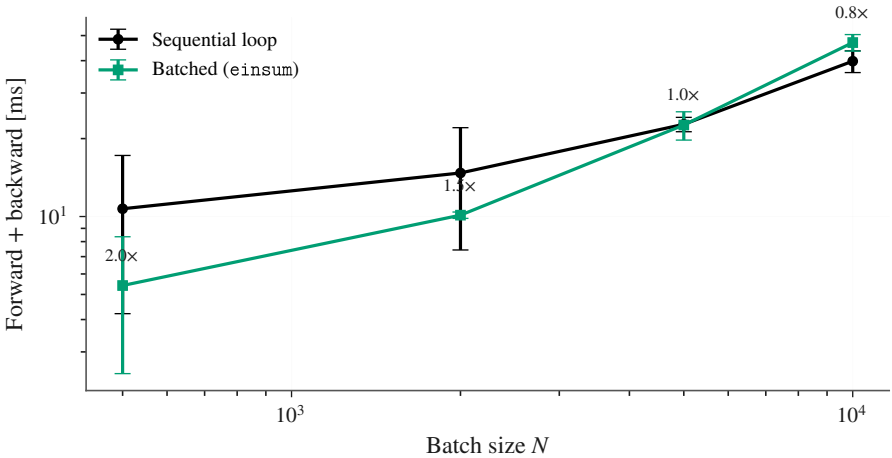

Supplement: Supplementary file 50 [file fig6_batched_speedup.pdf › d4-pinn/output_demo/figures/fig6_batched_speedup.pdf]

**(a)** Standard PINN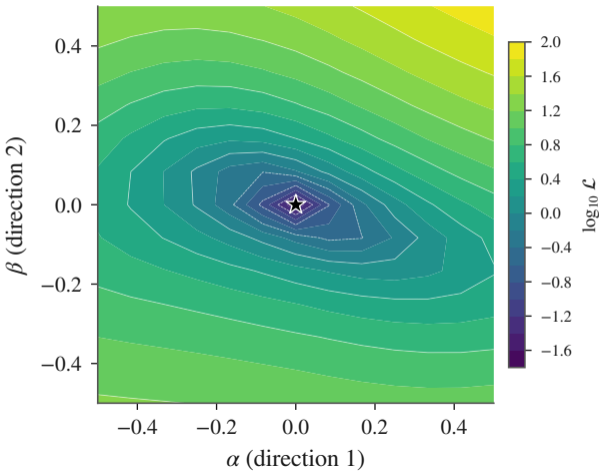**(b)**  $D_4$ -PINN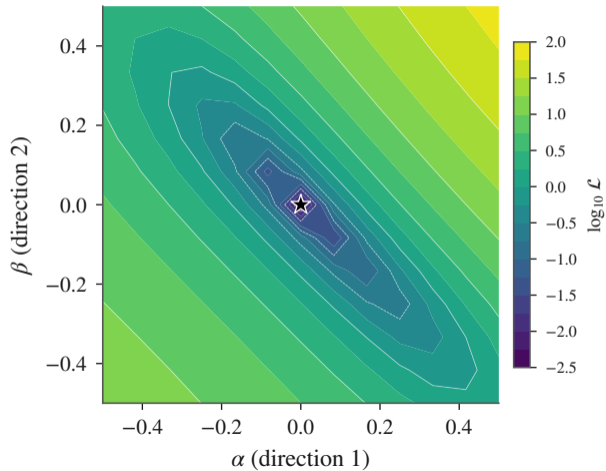

Supplement: Supplementary file 51 [file fig7_loss_landscape.pdf › d4-pinn/output_demo/figures/fig7_loss_landscape.pdf]

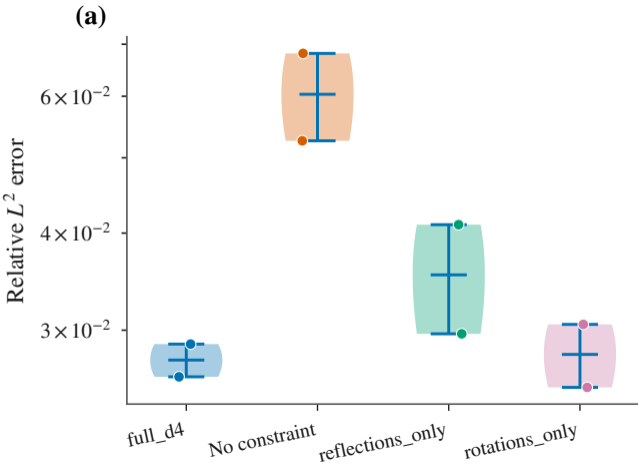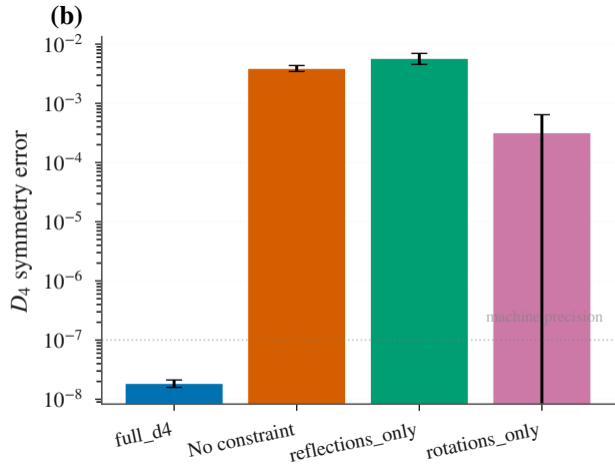

Supplement: Supplementary file 52 [file fig8_ablation.pdf › d4-pinn/output_demo/figures/fig8_ablation.pdf]

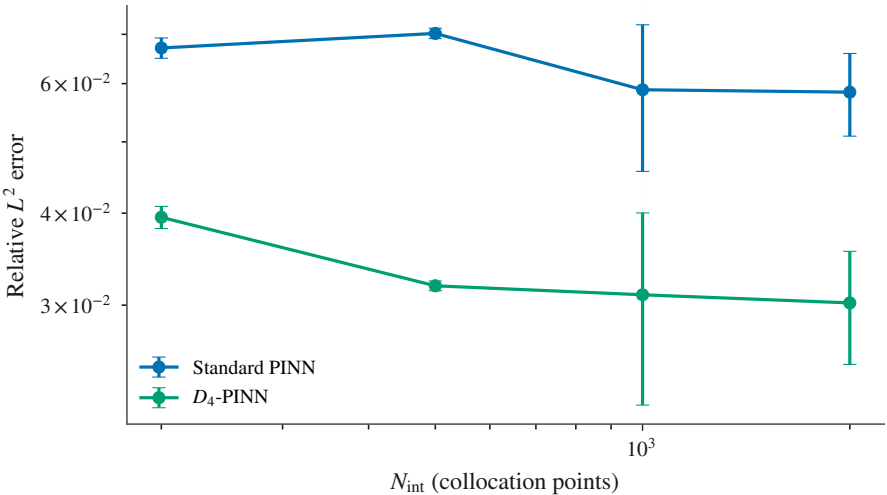

Supplement: Supplementary file 53 [file fig9_sample_efficiency.pdf › d4-pinn/output_demo/figures/fig9_sample_efficiency.pdf]

**(a)  $\kappa$  recovery error vs  $N_{\text{obs}}$** 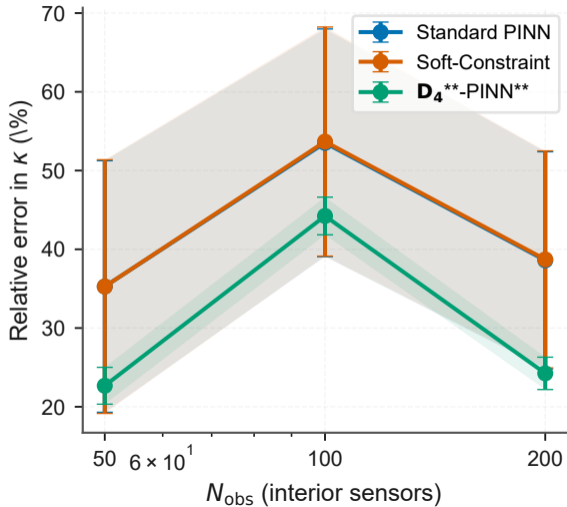**(b) PDE residual at  $N_{\text{obs}}$  (cheating diagnostic)**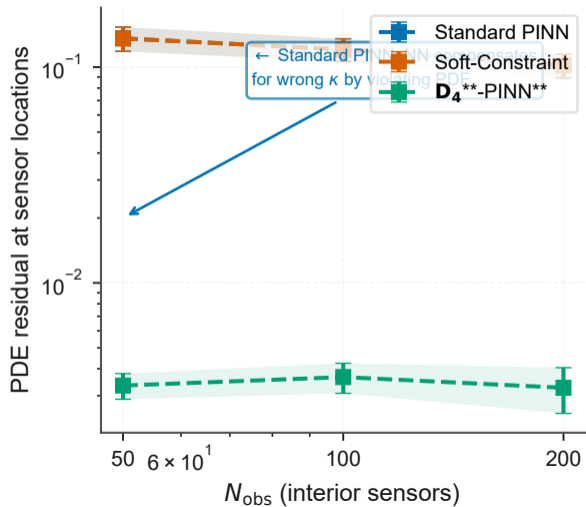

Supplement: Supplementary file 55 [file fig_aerospace_inverse.pdf › d4-pinn/output_demo/figures/fig_aerospace_inverse.pdf]

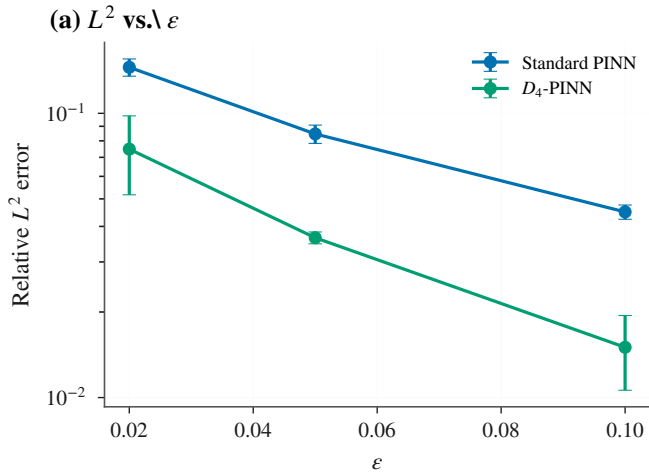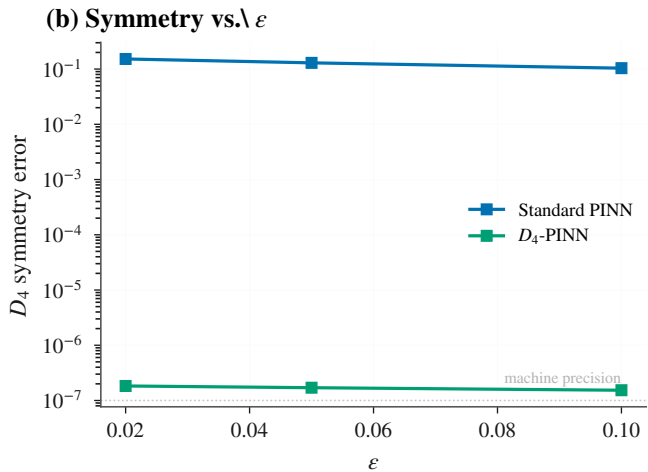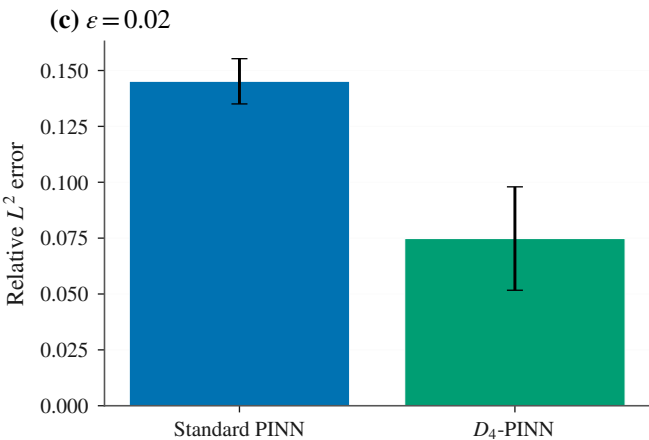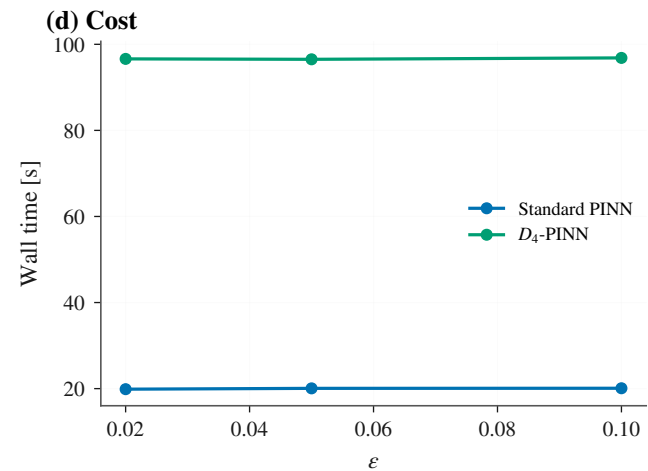

Supplement: Supplementary file 56 [file fig_allen_cahn.pdf › d4-pinn/output_demo/figures/fig_allen_cahn.pdf]

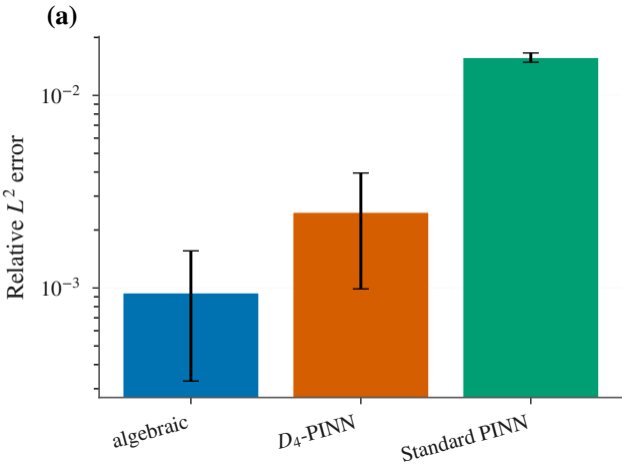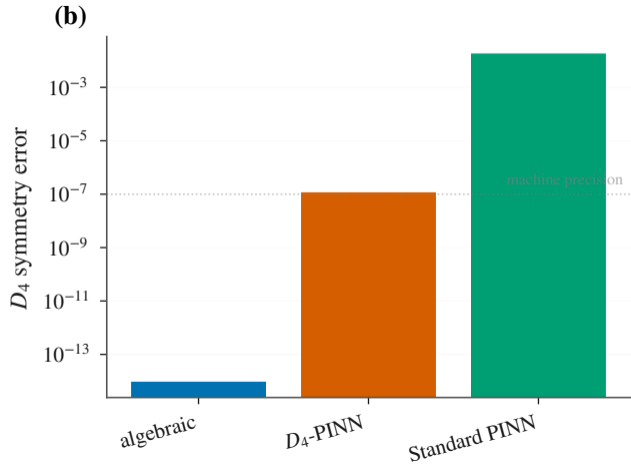

Supplement: Supplementary file 57 [file fig_cubic_semilinear.pdf › d4-pinn/output_demo/figures/fig_cubic_semilinear.pdf]

# PINN vs. FEM: heat conduction on $\Omega^2$

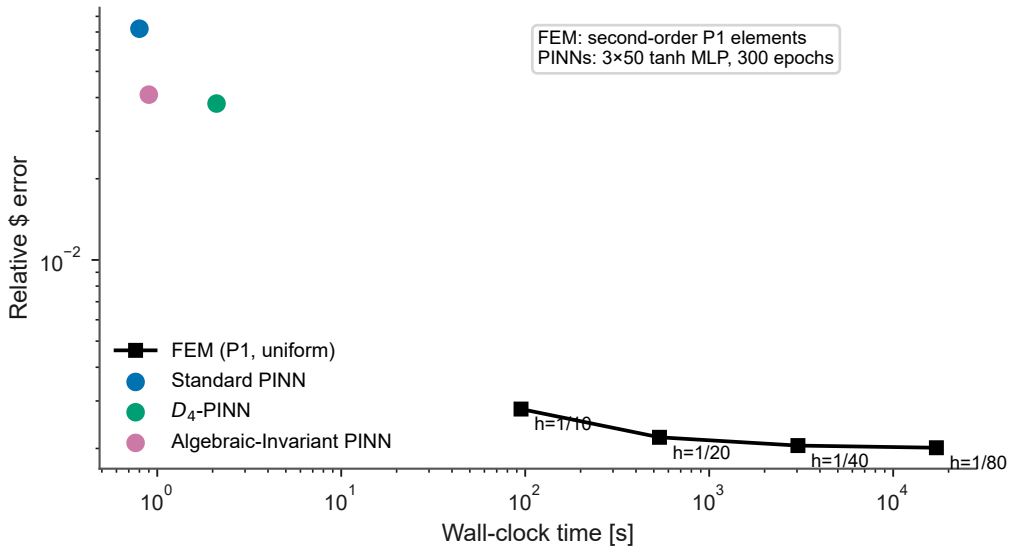

Supplement: Supplementary file 58 [file fig_fem_comparison.pdf › d4-pinn/output_demo/figures/fig_fem_comparison.pdf]

## GPU benchmark (device=cpu)

(a) Training throughput

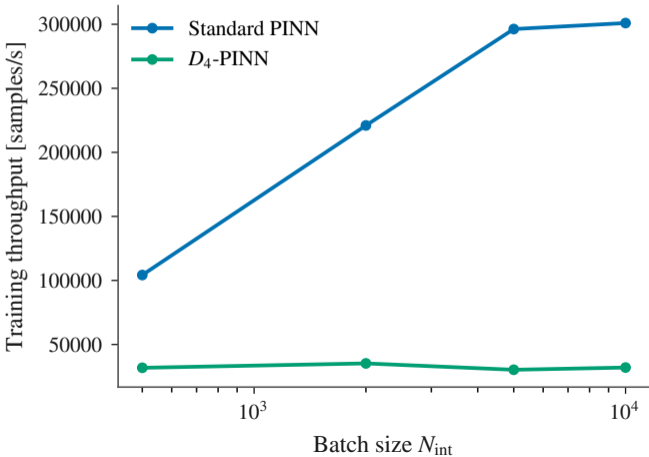

(b) Inference latency

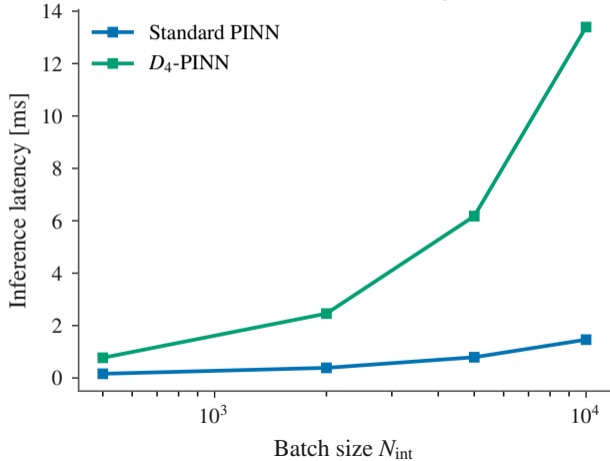

Supplement: Supplementary file 59 [file fig_gpu_benchmark.pdf › d4-pinn/output_demo/figures/fig_gpu_benchmark.pdf]

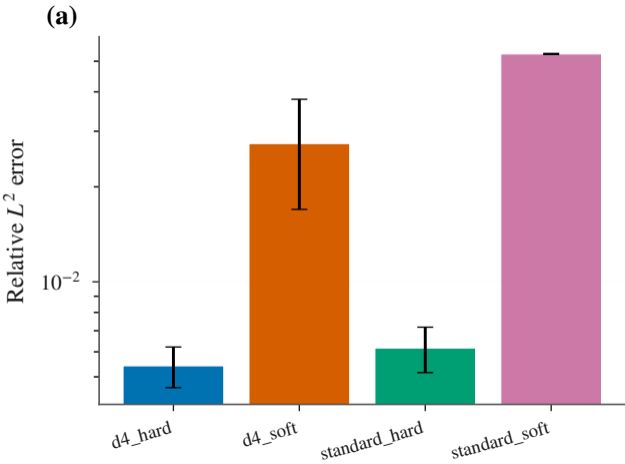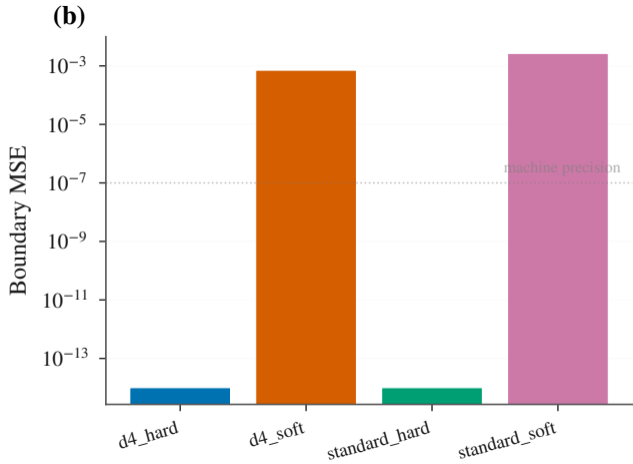

Supplement: Supplementary file 60 [file fig_hard_bc.pdf › d4-pinn/output_demo/figures/fig_hard_bc.pdf]

(a) Reaction rate  $k$  recovery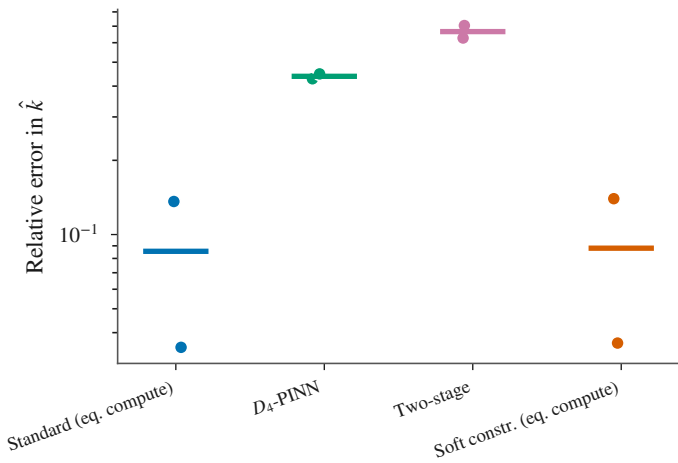(b) Source amplitude  $A$  recovery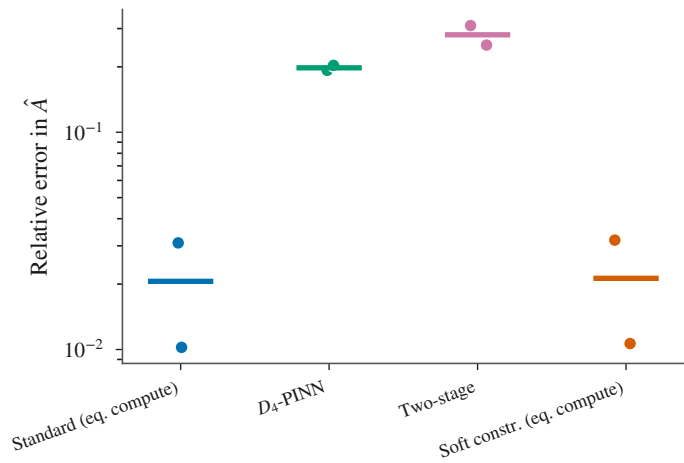(c)  $\hat{k}$  vs.  $k^* = 1$ 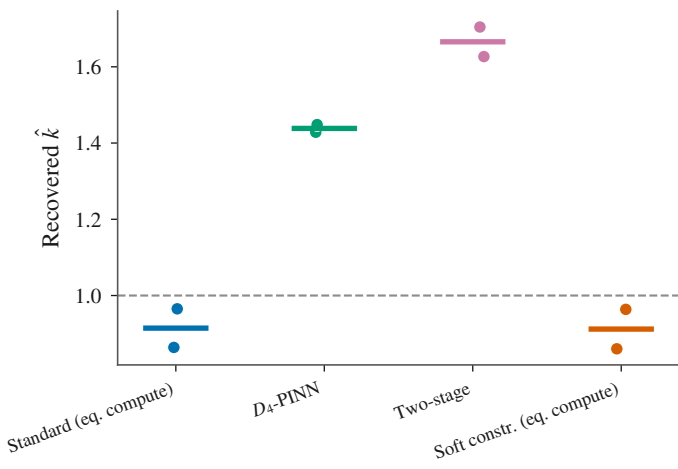

(d) Computational cost

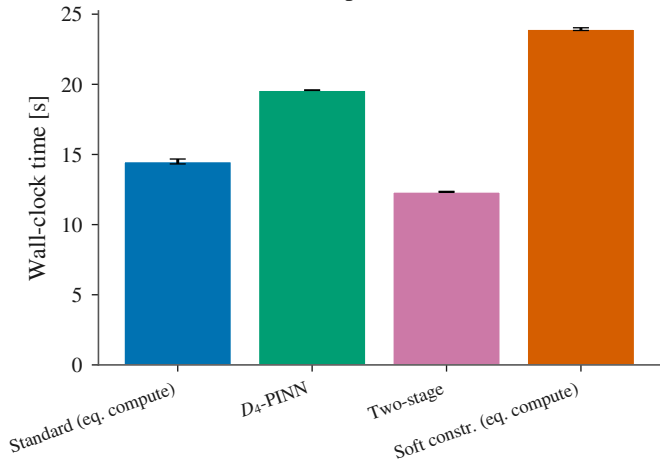

Supplement: Supplementary file 61 [file fig_inverse_revised.pdf › d4-pinn/output_demo/figures/fig_inverse_revised.pdf]

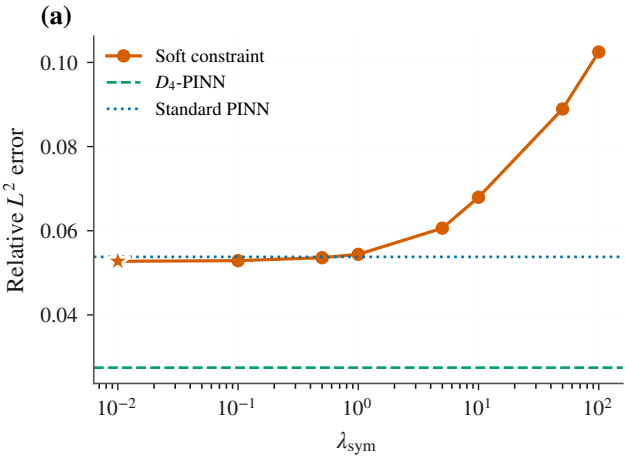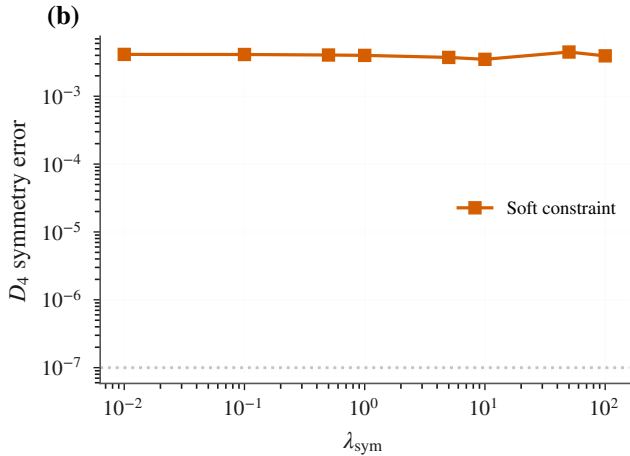

Supplement: Supplementary file 63 [file fig_soft_constraint_sweep.pdf › d4-pinn/output_demo/figures/fig_soft_constraint_sweep.pdf]

**Current Style Test**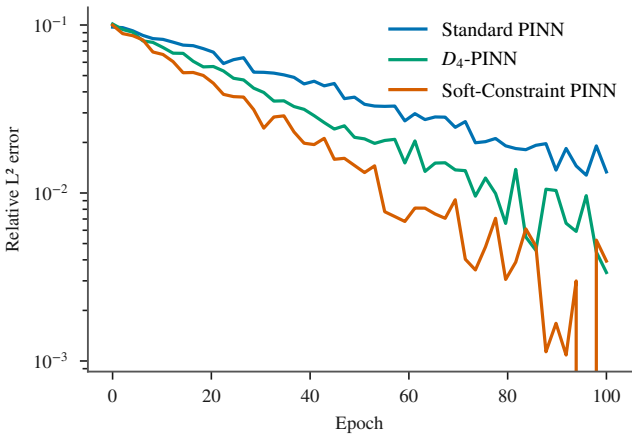**Minimalist Style**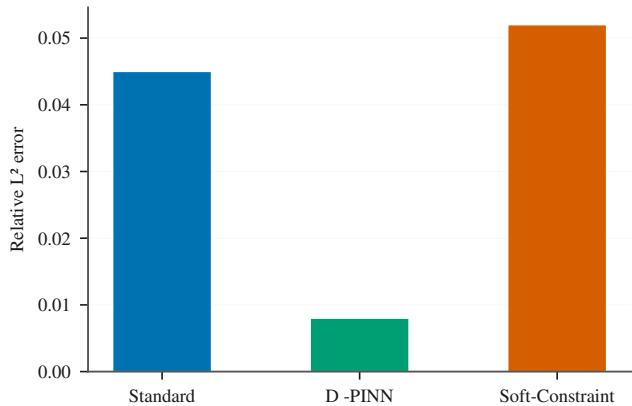

Supplement: Supplementary file 64 [file _style_test_current.pdf › d4-pinn/paper/figures/_style_test_current.pdf]

### 3D extension: planar $D_4$ does not constrain $z$

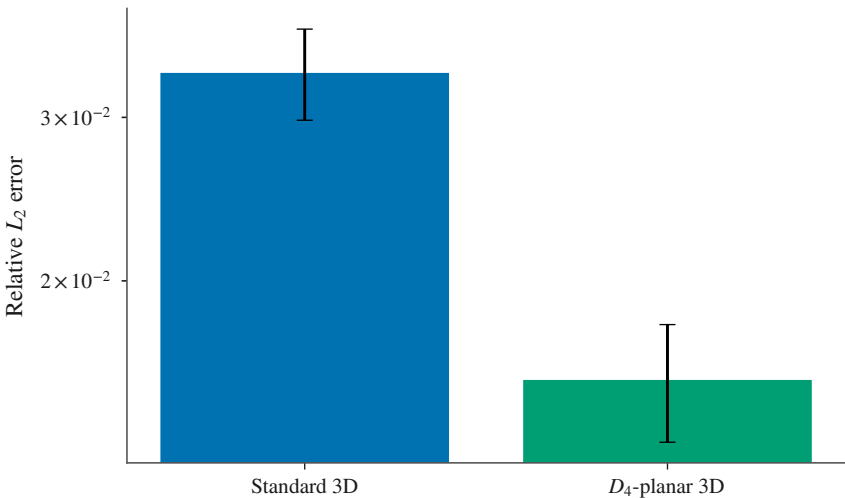

Supplement: Supplementary file 66 [file fig12_3d_extension.pdf › d4-pinn/paper/figures/fig12_3d_extension.pdf]

(a) Inverse problem: parameter recovery

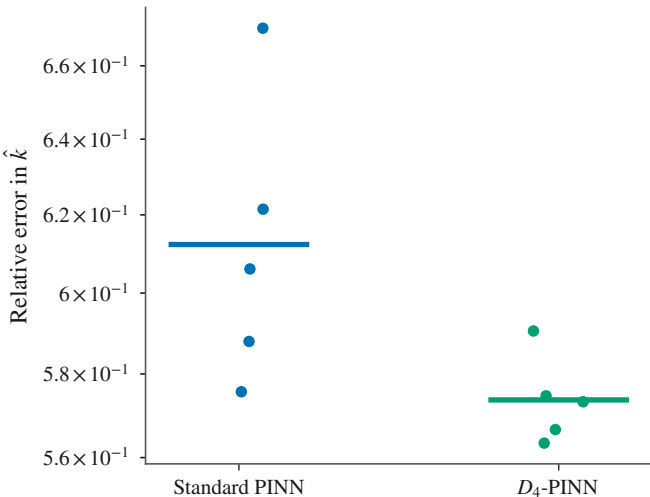

(b) Homotopic vs single-stage  $D_4$

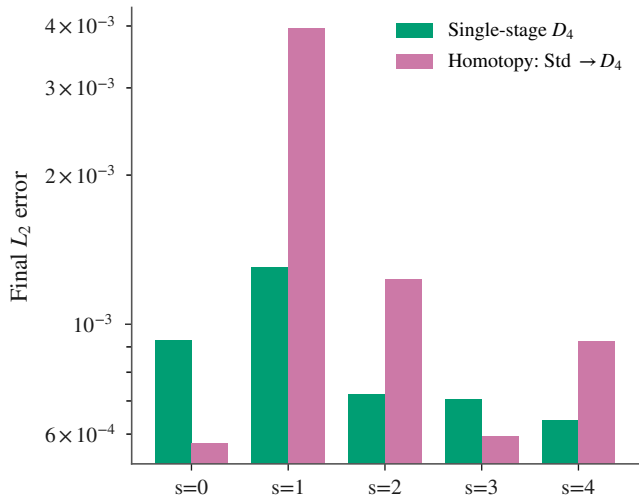

Supplement: Supplementary file 67 [file fig13_inverse_homotopy.pdf › d4-pinn/paper/figures/fig13_inverse_homotopy.pdf]

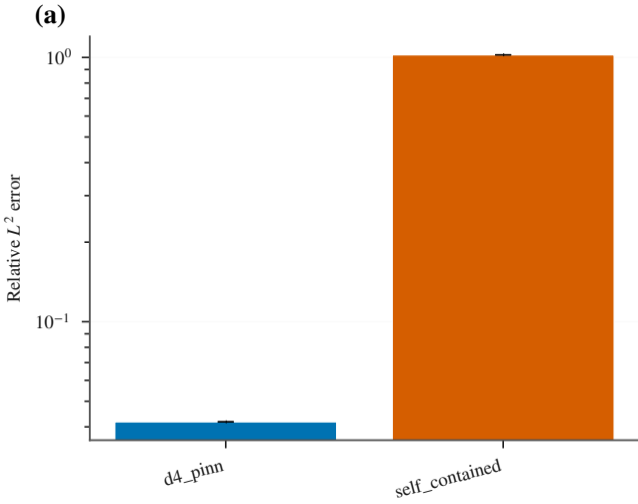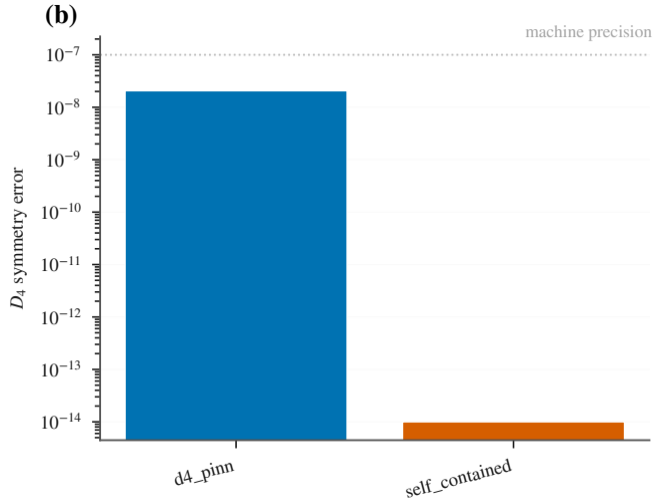

Supplement: Supplementary file 68 [file fig14_escnn_baseline.pdf › d4-pinn/paper/figures/fig14_escnn_baseline.pdf]

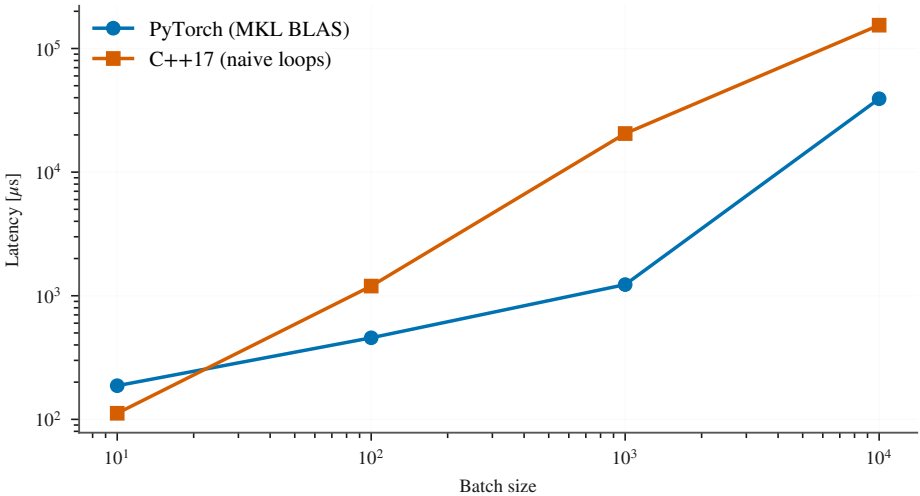

Supplement: Supplementary file 69 [file fig15_cpp_latency.pdf › d4-pinn/paper/figures/fig15_cpp_latency.pdf]

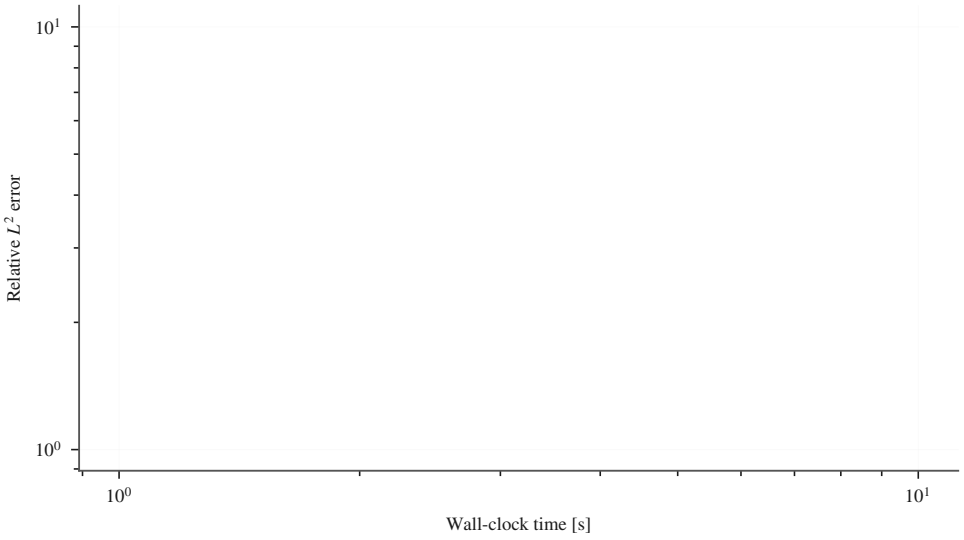

Supplement: Supplementary file 70 [file fig16_wallclock_equalised.pdf › d4-pinn/paper/figures/fig16_wallclock_equalised.pdf]

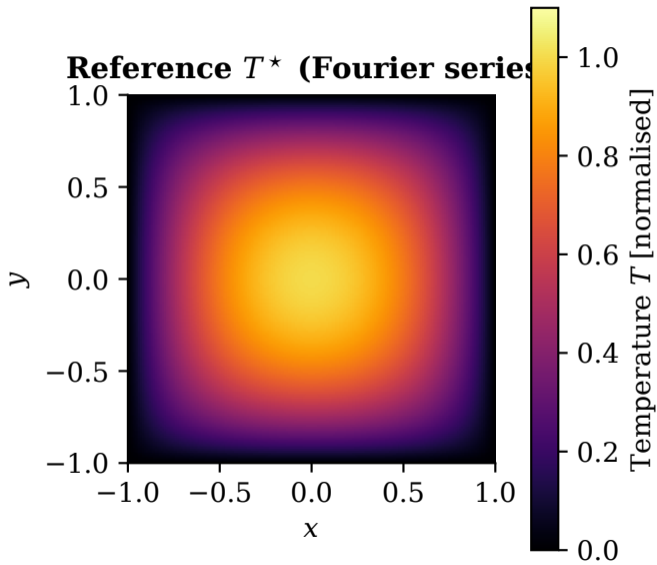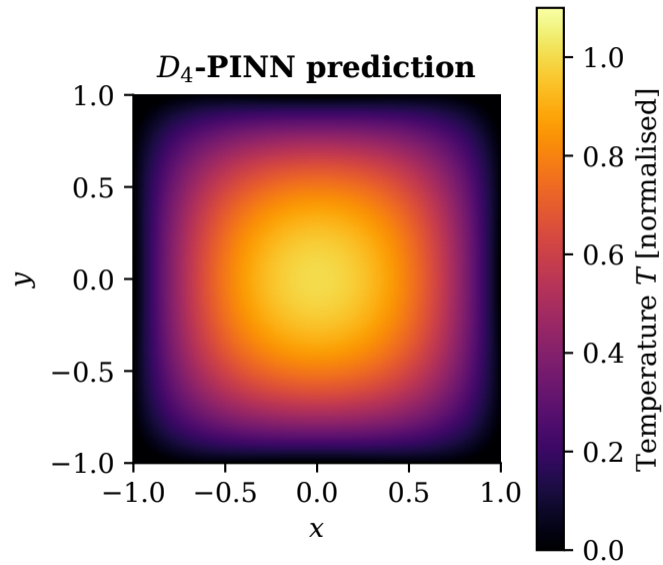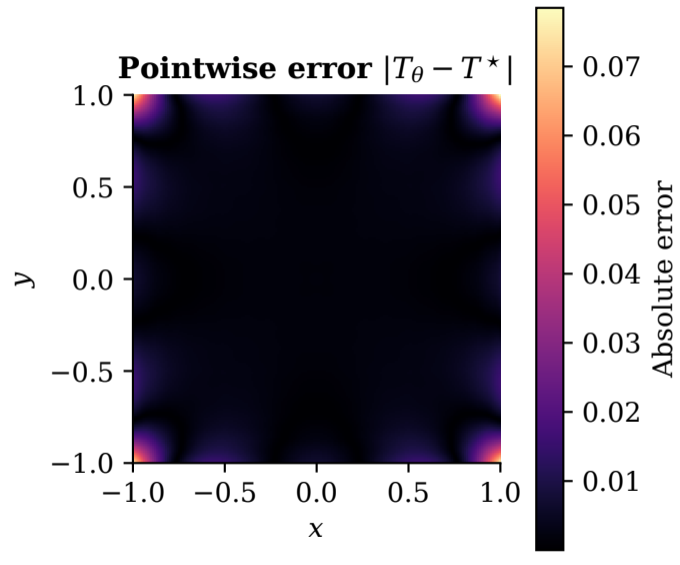

Supplement: Supplementary file 71 [file fig17_heat_conduction.pdf › d4-pinn/paper/figures/fig17_heat_conduction.pdf]

(a) Forward-problem accuracy

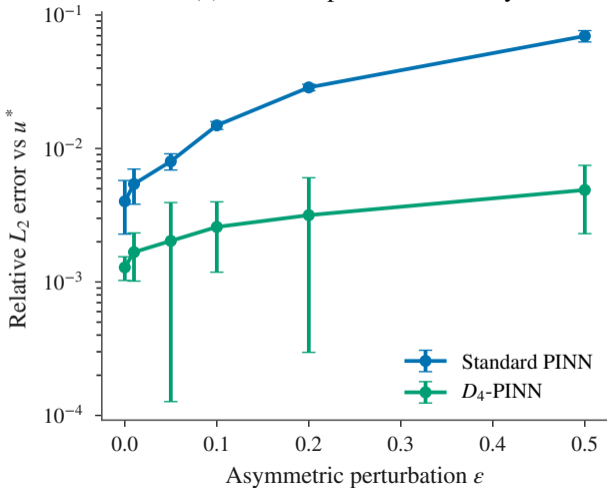

(b) Output symmetry deviation

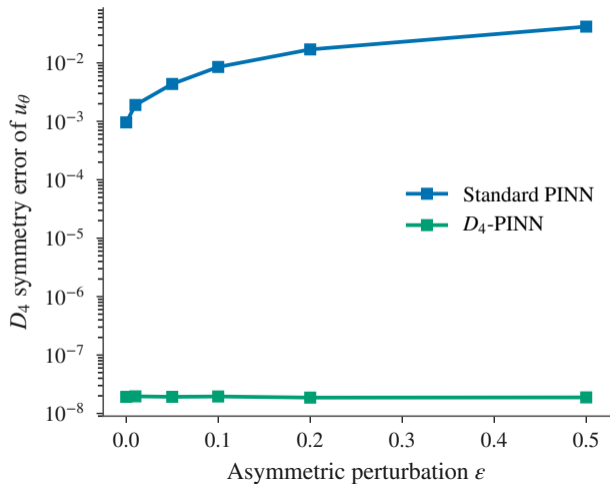

Supplement: Supplementary file 72 [file fig5_symmetry_breaking.pdf › d4-pinn/paper/figures/fig5_symmetry_breaking.pdf]

Batched vs sequential  $D_4$  averaging

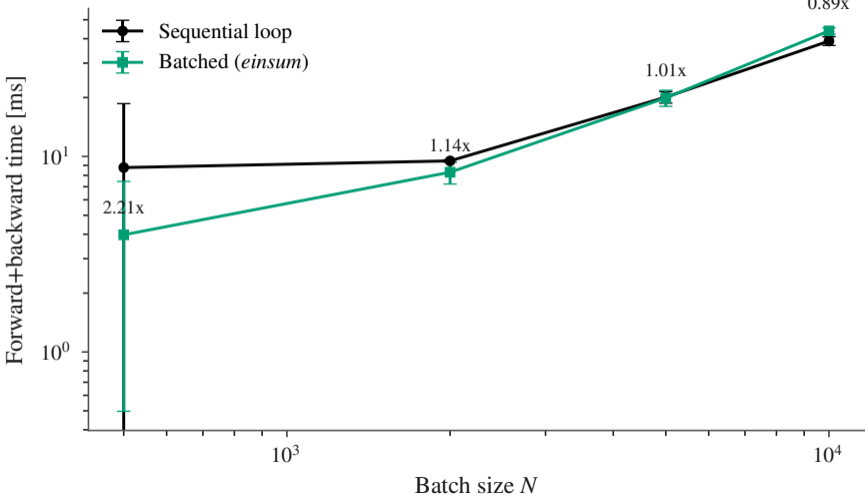

Supplement: Supplementary file 73 [file fig6_batched_speedup.pdf › d4-pinn/paper/figures/fig6_batched_speedup.pdf]

(a) Equal collocation count

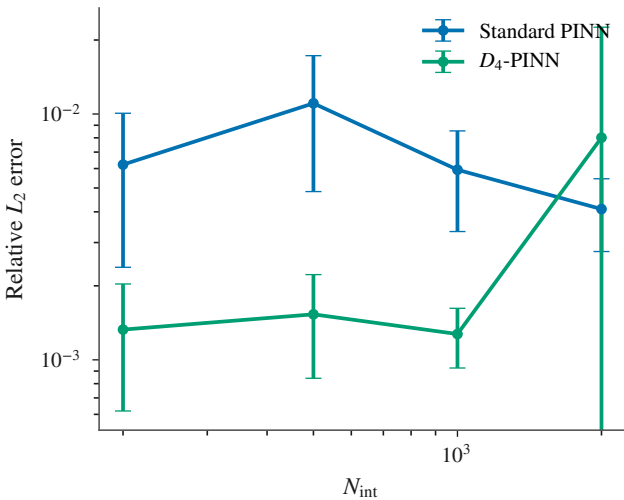

(b) Matched effective sample size

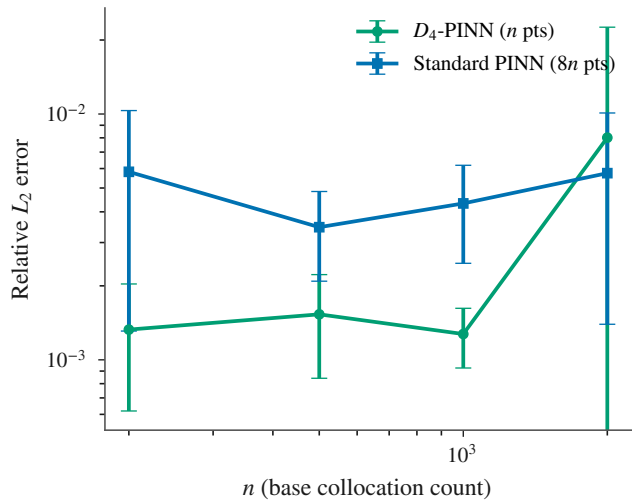

Supplement: Supplementary file 74 [file fig9_sample_efficiency.pdf › d4-pinn/paper/figures/fig9_sample_efficiency.pdf]

$$\text{Allen--Cahn equation: } \varepsilon^2 \Delta u + u - u^3 = 0$$

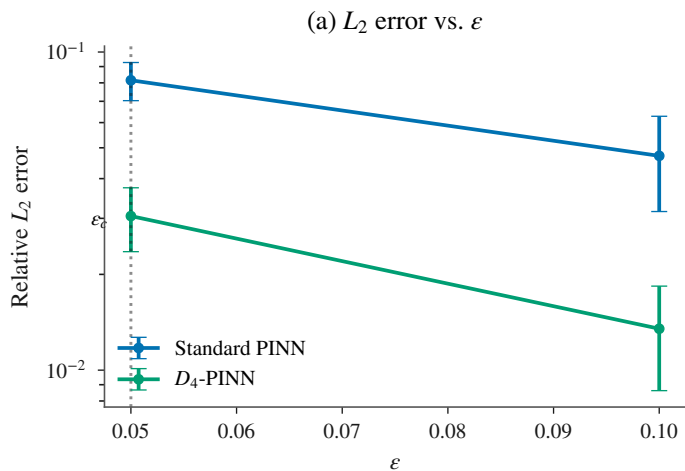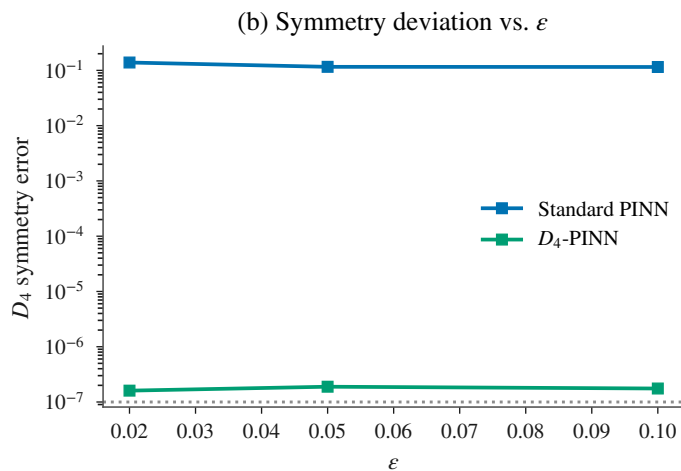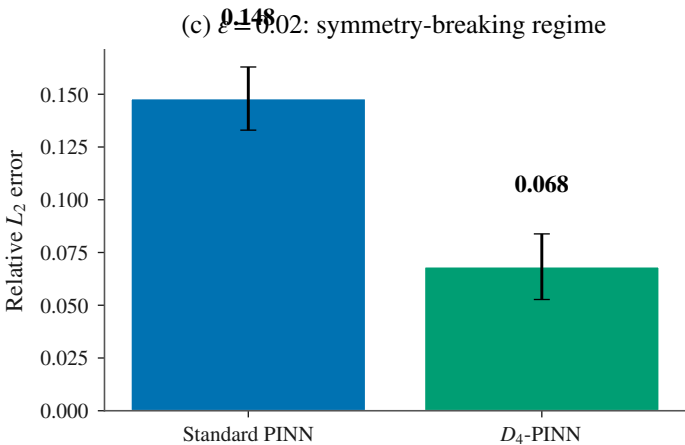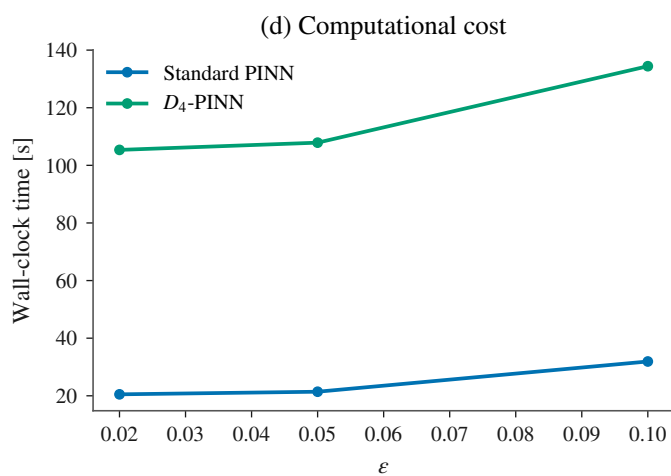

Supplement: Supplementary file 75 [file fig_allen_cahn.pdf › d4-pinn/paper/figures/fig_allen_cahn.pdf]

(a) Training throughput

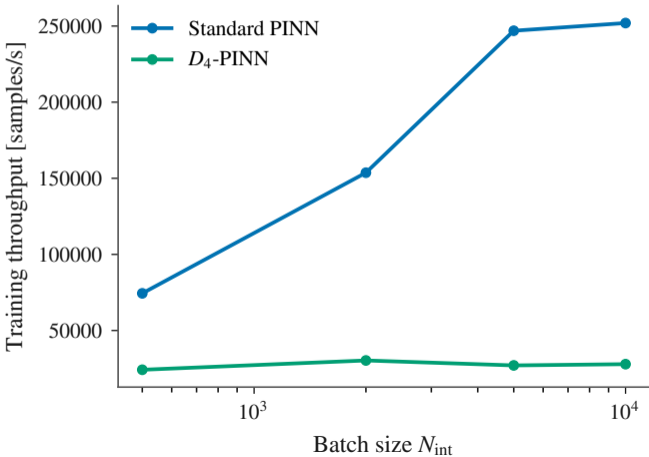

(b) Inference latency

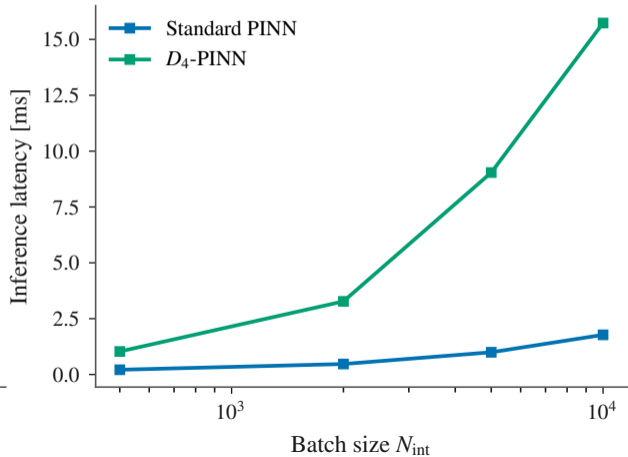

Supplement: Supplementary file 76 [file fig_gpu_benchmark.pdf › d4-pinn/paper/figures/fig_gpu_benchmark.pdf]

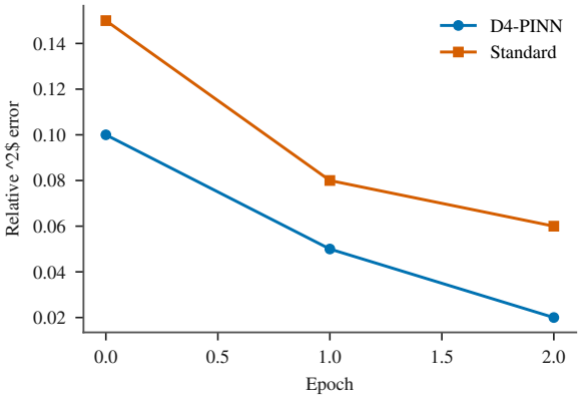

Supplement: Supplementary file 79 [file test_style_v2.pdf › d4-pinn/paper/figures/test_style_v2.pdf]
